# Supplementary material for: Causal associations between disorders of lipoprotein metabolism and ten cardiovascular diseases
Source: Front Cell Dev Biol. 2022 Oct 11;10:1023006. doi: 10.3389/fcell.2022.1023006 (PMC9593056; doi:10.3389/fcell.2022.1023006)
Supplement: Supplementary file 1 [file Table1.XLSX]

## Sheet: CAD
	SNP	effect_allele.exposure	other_allele.exposure	effect_allele.outcome	other_allele.outcome	beta.exposure	beta.outcome	eaf.exposure	eaf.outcome	remove	palindromic	ambiguous	id.outcome	chr	pos	se.outcome	samplesize.outcome	pval.outcome	outcome	originalname.outcome	outcome.deprecated	mr_keep.outcome	data_source.outcome	proxy.outcome	target_snp.outcome	proxy_snp.outcome	target_a1.outcome	target_a2.outcome	proxy_a1.outcome	proxy_a2.outcome	chr.exposure	samplesize.exposure	se.exposure	pval.exposure	pos.exposure	id.exposure	exposure	mr_keep.exposure	pval_origin.exposure	data_source.exposure	action	mr_keep
1	rs114483871	T	C	T	C	0.2116	-0.00180394	0.03571	NA	FALSE	FALSE	FALSE	ebi-a-GCST005195	4	73990168	0.0241784	547261	0.94	Coronary artery disease || id:ebi-a-GCST005195	Coronary artery disease	Coronary artery disease || ||	TRUE	igd	NA	NA	NA	NA	NA	NA	NA	4	NA	0.0364	6.32295e-09	73990168	finn-b-E4_LIPOPROT	Disorders of lipoprotein metabolism and other lipidaemias || id:finn-b-E4_LIPOPROT	TRUE	reported	igd	1	TRUE
2	rs11591147	T	G	T	G	-0.4097	-0.236991	0.03607	NA	FALSE	FALSE	FALSE	ebi-a-GCST005195	1	55505647	0.0269669	547261	1.50003e-18	Coronary artery disease || id:ebi-a-GCST005195	Coronary artery disease	Coronary artery disease || ||	TRUE	igd	NA	NA	NA	NA	NA	NA	NA	1	NA	0.0377	1.58891e-27	55505647	finn-b-E4_LIPOPROT	Disorders of lipoprotein metabolism and other lipidaemias || id:finn-b-E4_LIPOPROT	TRUE	reported	igd	1	TRUE
3	rs117113213	A	G	A	G	0.1487	0.0711701	0.06541	NA	FALSE	FALSE	FALSE	ebi-a-GCST005195	20	39165692	0.0202084	547261	0.000430002	Coronary artery disease || id:ebi-a-GCST005195	Coronary artery disease	Coronary artery disease || ||	TRUE	igd	NA	NA	NA	NA	NA	NA	NA	20	NA	0.0271	4.091e-08	39165692	finn-b-E4_LIPOPROT	Disorders of lipoprotein metabolism and other lipidaemias || id:finn-b-E4_LIPOPROT	TRUE	reported	igd	1	TRUE
4	rs117733303	G	A	G	A	0.4282	0.451693	0.01135	NA	FALSE	FALSE	FALSE	ebi-a-GCST005195	6	160922870	0.0263634	547261	8.4004e-66	Coronary artery disease || id:ebi-a-GCST005195	Coronary artery disease	Coronary artery disease || ||	TRUE	igd	NA	NA	NA	NA	NA	NA	NA	6	NA	0.0644	2.86814e-11	160922870	finn-b-E4_LIPOPROT	Disorders of lipoprotein metabolism and other lipidaemias || id:finn-b-E4_LIPOPROT	TRUE	reported	igd	1	TRUE
5	rs12131840	T	C	T	C	0.1005	0.00538309	0.1774	NA	FALSE	FALSE	FALSE	ebi-a-GCST005195	1	66231771	0.0107525	547261	0.62	Coronary artery disease || id:ebi-a-GCST005195	Coronary artery disease	Coronary artery disease || ||	TRUE	igd	NA	NA	NA	NA	NA	NA	NA	1	NA	0.0175	8.49591e-09	66231771	finn-b-E4_LIPOPROT	Disorders of lipoprotein metabolism and other lipidaemias || id:finn-b-E4_LIPOPROT	TRUE	reported	igd	1	TRUE
6	rs12916	C	T	C	T	0.0802	0.0135761	0.4537	NA	FALSE	FALSE	FALSE	ebi-a-GCST005195	5	74656539	0.00710026	547261	0.0560003	Coronary artery disease || id:ebi-a-GCST005195	Coronary artery disease	Coronary artery disease || ||	TRUE	igd	NA	NA	NA	NA	NA	NA	NA	5	NA	0.0133	1.892e-09	74656539	finn-b-E4_LIPOPROT	Disorders of lipoprotein metabolism and other lipidaemias || id:finn-b-E4_LIPOPROT	TRUE	reported	igd	1	TRUE
7	rs1367117	A	G	A	G	0.1196	0.0274257	0.2812	NA	FALSE	FALSE	FALSE	ebi-a-GCST005195	2	21263900	0.00746595	547261	0.000239999	Coronary artery disease || id:ebi-a-GCST005195	Coronary artery disease	Coronary artery disease || ||	TRUE	igd	NA	NA	NA	NA	NA	NA	NA	2	NA	0.0148	5.25049e-16	21263900	finn-b-E4_LIPOPROT	Disorders of lipoprotein metabolism and other lipidaemias || id:finn-b-E4_LIPOPROT	TRUE	reported	igd	1	TRUE
8	rs2954021	G	A	G	A	-0.0984	-0.05067	0.5364	NA	FALSE	FALSE	FALSE	ebi-a-GCST005195	8	126482077	0.00694854	547261	3.10027e-13	Coronary artery disease || id:ebi-a-GCST005195	Coronary artery disease	Coronary artery disease || ||	TRUE	igd	NA	NA	NA	NA	NA	NA	NA	8	NA	0.0133	1.34803e-13	126482077	finn-b-E4_LIPOPROT	Disorders of lipoprotein metabolism and other lipidaemias || id:finn-b-E4_LIPOPROT	TRUE	reported	igd	1	TRUE
9	rs41279633	T	G	T	G	0.0959	0.0446732	0.2101	NA	FALSE	FALSE	FALSE	ebi-a-GCST005195	7	44580876	0.00981076	547261	5.30005e-06	Coronary artery disease || id:ebi-a-GCST005195	Coronary artery disease	Coronary artery disease || ||	TRUE	igd	NA	NA	NA	NA	NA	NA	NA	7	NA	0.0163	4.495e-09	44580876	finn-b-E4_LIPOPROT	Disorders of lipoprotein metabolism and other lipidaemias || id:finn-b-E4_LIPOPROT	TRUE	reported	igd	1	TRUE
10	rs499883	A	G	A	G	0.1107	0.0138521	0.5291	NA	FALSE	FALSE	FALSE	ebi-a-GCST005195	1	55519174	0.00728107	547261	0.0569994	Coronary artery disease || id:ebi-a-GCST005195	Coronary artery disease	Coronary artery disease || ||	TRUE	igd	NA	NA	NA	NA	NA	NA	NA	1	NA	0.0134	1.53815e-16	55519174	finn-b-E4_LIPOPROT	Disorders of lipoprotein metabolism and other lipidaemias || id:finn-b-E4_LIPOPROT	TRUE	reported	igd	1	TRUE
11	rs56132765	A	G	A	G	-0.1686	-0.0626919	0.08221	NA	FALSE	FALSE	FALSE	ebi-a-GCST005195	2	44078853	0.0144492	547261	1.40001e-05	Coronary artery disease || id:ebi-a-GCST005195	Coronary artery disease	Coronary artery disease || ||	TRUE	igd	NA	NA	NA	NA	NA	NA	NA	2	NA	0.0243	4.40048e-12	44078853	finn-b-E4_LIPOPROT	Disorders of lipoprotein metabolism and other lipidaemias || id:finn-b-E4_LIPOPROT	TRUE	reported	igd	1	TRUE
12	rs646356	A	T	A	T	0.0993	-0.00457536	0.8319	NA	FALSE	TRUE	TRUE	ebi-a-GCST005195	1	55167773	0.0100407	547261	0.649999	Coronary artery disease || id:ebi-a-GCST005195	Coronary artery disease	Coronary artery disease || ||	TRUE	igd	NA	NA	NA	NA	NA	NA	NA	1	NA	0.018	3.16804e-08	55167773	finn-b-E4_LIPOPROT	Disorders of lipoprotein metabolism and other lipidaemias || id:finn-b-E4_LIPOPROT	TRUE	reported	igd	1	TRUE
13	rs646776	T	C	T	C	0.148	0.102649	0.7856	NA	FALSE	FALSE	FALSE	ebi-a-GCST005195	1	109818530	0.00828286	547261	2.90001e-35	Coronary artery disease || id:ebi-a-GCST005195	Coronary artery disease	Coronary artery disease || ||	TRUE	igd	NA	NA	NA	NA	NA	NA	NA	1	NA	0.0163	1.31492e-19	109818530	finn-b-E4_LIPOPROT	Disorders of lipoprotein metabolism and other lipidaemias || id:finn-b-E4_LIPOPROT	TRUE	reported	igd	1	TRUE
14	rs7412	T	C	T	C	-0.4034	-0.136727	0.05343	NA	FALSE	FALSE	FALSE	ebi-a-GCST005195	19	45412079	0.0127411	547261	7.29962e-27	Coronary artery disease || id:ebi-a-GCST005195	Coronary artery disease	Coronary artery disease || ||	TRUE	igd	NA	NA	NA	NA	NA	NA	NA	19	NA	0.0307	1.91205e-39	45412079	finn-b-E4_LIPOPROT	Disorders of lipoprotein metabolism and other lipidaemias || id:finn-b-E4_LIPOPROT	TRUE	reported	igd	1	TRUE
15	rs74617384	T	A	T	A	0.2167	0.311049	0.04583	NA	FALSE	TRUE	TRUE	ebi-a-GCST005195	6	160997118	0.0134364	547261	1.49968e-118	Coronary artery disease || id:ebi-a-GCST005195	Coronary artery disease	Coronary artery disease || ||	TRUE	igd	NA	NA	NA	NA	NA	NA	NA	6	NA	0.0319	1.0311e-11	160997118	finn-b-E4_LIPOPROT	Disorders of lipoprotein metabolism and other lipidaemias || id:finn-b-E4_LIPOPROT	TRUE	reported	igd	1	TRUE
16	rs77645768	A	G	A	G	0.3141	0.0523198	0.02681	NA	FALSE	FALSE	FALSE	ebi-a-GCST005195	4	73668828	0.0235937	547261	0.0269998	Coronary artery disease || id:ebi-a-GCST005195	Coronary artery disease	Coronary artery disease || ||	TRUE	igd	NA	NA	NA	NA	NA	NA	NA	4	NA	0.0424	1.31704e-13	73668828	finn-b-E4_LIPOPROT	Disorders of lipoprotein metabolism and other lipidaemias || id:finn-b-E4_LIPOPROT	TRUE	reported	igd	1	TRUE
17	rs8106503	C	T	C	T	-0.2277	-0.103758	0.1021	NA	FALSE	FALSE	FALSE	ebi-a-GCST005195	19	11196886	0.0106219	547261	1.50003e-22	Coronary artery disease || id:ebi-a-GCST005195	Coronary artery disease	Coronary artery disease || ||	TRUE	igd	NA	NA	NA	NA	NA	NA	NA	19	NA	0.0224	2.99571e-24	11196886	finn-b-E4_LIPOPROT	Disorders of lipoprotein metabolism and other lipidaemias || id:finn-b-E4_LIPOPROT	TRUE	reported	igd	1	TRUE
18	rs964184	C	G	C	G	-0.185	-0.0603692	0.8541	NA	FALSE	TRUE	TRUE	ebi-a-GCST005195	11	116648917	0.0100968	547261	2.19999e-09	Coronary artery disease || id:ebi-a-GCST005195	Coronary artery disease	Coronary artery disease || ||	TRUE	igd	NA	NA	NA	NA	NA	NA	NA	11	NA	0.0189	1.61585e-22	116648917	finn-b-E4_LIPOPROT	Disorders of lipoprotein metabolism and other lipidaemias || id:finn-b-E4_LIPOPROT	TRUE	reported	igd	1	TRUE
19	rs9644859	A	G	A	G	0.0935	0.170436	0.4182	NA	FALSE	FALSE	FALSE	ebi-a-GCST005195	9	22098574	0.00699009	547261	2.60016e-131	Coronary artery disease || id:ebi-a-GCST005195	Coronary artery disease	Coronary artery disease || ||	TRUE	igd	TRUE	rs9644859	rs4977574	A	G	G	A	9	NA	0.0134	3.49382e-12	22090521	finn-b-E4_LIPOPROT	Disorders of lipoprotein metabolism and other lipidaemias || id:finn-b-E4_LIPOPROT	TRUE	reported	igd	1	TRUE

## Sheet: Aortic aneurysm
	SNP	effect_allele.exposure	other_allele.exposure	effect_allele.outcome	other_allele.outcome	beta.exposure	beta.outcome	eaf.exposure	eaf.outcome	remove	palindromic	ambiguous	id.outcome	chr	pos	se.outcome	samplesize.outcome	pval.outcome	outcome	originalname.outcome	outcome.deprecated	mr_keep.outcome	data_source.outcome	chr.exposure	samplesize.exposure	se.exposure	pval.exposure	pos.exposure	id.exposure	exposure	mr_keep.exposure	pval_origin.exposure	data_source.exposure	action	mr_keep
1	rs1135498	C	T	C	T	0.094	-0.0068	0.2112	0.2111	FALSE	FALSE	FALSE	finn-b-I9_AORTANEUR	13	115052938	0.0351	NA	0.8471	Aortic aneurysm || id:finn-b-I9_AORTANEUR	Aortic aneurysm	Aortic aneurysm || ||	TRUE	igd	13	NA	0.0165	1.32501e-08	115052938	finn-b-E4_LIPOPROT	Disorders of lipoprotein metabolism and other lipidaemias || id:finn-b-E4_LIPOPROT	TRUE	reported	igd	1	TRUE
2	rs114483871	T	C	T	C	0.2116	0.1124	0.03571	0.03565	FALSE	FALSE	FALSE	finn-b-I9_AORTANEUR	4	73990168	0.0765	NA	0.1419	Aortic aneurysm || id:finn-b-I9_AORTANEUR	Aortic aneurysm	Aortic aneurysm || ||	TRUE	igd	4	NA	0.0364	6.32295e-09	73990168	finn-b-E4_LIPOPROT	Disorders of lipoprotein metabolism and other lipidaemias || id:finn-b-E4_LIPOPROT	TRUE	reported	igd	1	TRUE
3	rs115478735	T	A	T	A	0.1251	-0.004	0.1974	0.1971	FALSE	TRUE	FALSE	finn-b-I9_AORTANEUR	9	136149711	0.0352	NA	0.9104	Aortic aneurysm || id:finn-b-I9_AORTANEUR	Aortic aneurysm	Aortic aneurysm || ||	TRUE	igd	9	NA	0.0167	6.74062e-14	136149711	finn-b-E4_LIPOPROT	Disorders of lipoprotein metabolism and other lipidaemias || id:finn-b-E4_LIPOPROT	TRUE	reported	igd	1	TRUE
4	rs11591147	T	G	T	G	-0.4097	-0.075	0.03607	0.0362	FALSE	FALSE	FALSE	finn-b-I9_AORTANEUR	1	55505647	0.0769	NA	0.3291	Aortic aneurysm || id:finn-b-I9_AORTANEUR	Aortic aneurysm	Aortic aneurysm || ||	TRUE	igd	1	NA	0.0377	1.58891e-27	55505647	finn-b-E4_LIPOPROT	Disorders of lipoprotein metabolism and other lipidaemias || id:finn-b-E4_LIPOPROT	TRUE	reported	igd	1	TRUE
5	rs117113213	A	G	A	G	0.1487	-0.0155	0.06541	0.06531	FALSE	FALSE	FALSE	finn-b-I9_AORTANEUR	20	39165692	0.0568	NA	0.785199	Aortic aneurysm || id:finn-b-I9_AORTANEUR	Aortic aneurysm	Aortic aneurysm || ||	TRUE	igd	20	NA	0.0271	4.091e-08	39165692	finn-b-E4_LIPOPROT	Disorders of lipoprotein metabolism and other lipidaemias || id:finn-b-E4_LIPOPROT	TRUE	reported	igd	1	TRUE
6	rs117733303	G	A	G	A	0.4282	0.3614	0.01135	0.0112	FALSE	FALSE	FALSE	finn-b-I9_AORTANEUR	6	160922870	0.1333	NA	0.00668698	Aortic aneurysm || id:finn-b-I9_AORTANEUR	Aortic aneurysm	Aortic aneurysm || ||	TRUE	igd	6	NA	0.0644	2.86814e-11	160922870	finn-b-E4_LIPOPROT	Disorders of lipoprotein metabolism and other lipidaemias || id:finn-b-E4_LIPOPROT	TRUE	reported	igd	1	TRUE
7	rs12131840	T	C	T	C	0.1005	0.0535	0.1774	0.1775	FALSE	FALSE	FALSE	finn-b-I9_AORTANEUR	1	66231771	0.0368	NA	0.146	Aortic aneurysm || id:finn-b-I9_AORTANEUR	Aortic aneurysm	Aortic aneurysm || ||	TRUE	igd	1	NA	0.0175	8.49591e-09	66231771	finn-b-E4_LIPOPROT	Disorders of lipoprotein metabolism and other lipidaemias || id:finn-b-E4_LIPOPROT	TRUE	reported	igd	1	TRUE
8	rs12916	C	T	C	T	0.0802	0.0922	0.4537	0.4538	FALSE	FALSE	FALSE	finn-b-I9_AORTANEUR	5	74656539	0.0281	NA	0.001034	Aortic aneurysm || id:finn-b-I9_AORTANEUR	Aortic aneurysm	Aortic aneurysm || ||	TRUE	igd	5	NA	0.0133	1.892e-09	74656539	finn-b-E4_LIPOPROT	Disorders of lipoprotein metabolism and other lipidaemias || id:finn-b-E4_LIPOPROT	TRUE	reported	igd	1	TRUE
9	rs1367117	A	G	A	G	0.1196	-0.0054	0.2812	0.281	FALSE	FALSE	FALSE	finn-b-I9_AORTANEUR	2	21263900	0.0311	NA	0.863	Aortic aneurysm || id:finn-b-I9_AORTANEUR	Aortic aneurysm	Aortic aneurysm || ||	TRUE	igd	2	NA	0.0148	5.25049e-16	21263900	finn-b-E4_LIPOPROT	Disorders of lipoprotein metabolism and other lipidaemias || id:finn-b-E4_LIPOPROT	TRUE	reported	igd	1	TRUE
10	rs182695896	C	A	C	A	0.2843	-0.0617	0.02581	0.02576	FALSE	FALSE	FALSE	finn-b-I9_AORTANEUR	4	74813227	0.0897	NA	0.491801	Aortic aneurysm || id:finn-b-I9_AORTANEUR	Aortic aneurysm	Aortic aneurysm || ||	TRUE	igd	4	NA	0.0427	2.92415e-11	74813227	finn-b-E4_LIPOPROT	Disorders of lipoprotein metabolism and other lipidaemias || id:finn-b-E4_LIPOPROT	TRUE	reported	igd	1	TRUE
11	rs2954021	G	A	G	A	-0.0984	-0.0487	0.5364	0.5364	FALSE	FALSE	FALSE	finn-b-I9_AORTANEUR	8	126482077	0.028	NA	0.0817391	Aortic aneurysm || id:finn-b-I9_AORTANEUR	Aortic aneurysm	Aortic aneurysm || ||	TRUE	igd	8	NA	0.0133	1.34803e-13	126482077	finn-b-E4_LIPOPROT	Disorders of lipoprotein metabolism and other lipidaemias || id:finn-b-E4_LIPOPROT	TRUE	reported	igd	1	TRUE
12	rs41279633	T	G	T	G	0.0959	0.0424	0.2101	0.2097	FALSE	FALSE	FALSE	finn-b-I9_AORTANEUR	7	44580876	0.0345	NA	0.2187	Aortic aneurysm || id:finn-b-I9_AORTANEUR	Aortic aneurysm	Aortic aneurysm || ||	TRUE	igd	7	NA	0.0163	4.495e-09	44580876	finn-b-E4_LIPOPROT	Disorders of lipoprotein metabolism and other lipidaemias || id:finn-b-E4_LIPOPROT	TRUE	reported	igd	1	TRUE
13	rs499883	A	G	A	G	0.1107	0.0502	0.5291	0.5286	FALSE	FALSE	FALSE	finn-b-I9_AORTANEUR	1	55519174	0.0283	NA	0.0754397	Aortic aneurysm || id:finn-b-I9_AORTANEUR	Aortic aneurysm	Aortic aneurysm || ||	TRUE	igd	1	NA	0.0134	1.53815e-16	55519174	finn-b-E4_LIPOPROT	Disorders of lipoprotein metabolism and other lipidaemias || id:finn-b-E4_LIPOPROT	TRUE	reported	igd	1	TRUE
14	rs56132765	A	G	A	G	-0.1686	-0.1465	0.08221	0.08222	FALSE	FALSE	FALSE	finn-b-I9_AORTANEUR	2	44078853	0.0511	NA	0.004142	Aortic aneurysm || id:finn-b-I9_AORTANEUR	Aortic aneurysm	Aortic aneurysm || ||	TRUE	igd	2	NA	0.0243	4.40048e-12	44078853	finn-b-E4_LIPOPROT	Disorders of lipoprotein metabolism and other lipidaemias || id:finn-b-E4_LIPOPROT	TRUE	reported	igd	1	TRUE
15	rs646356	A	T	A	T	0.0993	-0.0103	0.8319	0.8318	FALSE	TRUE	FALSE	finn-b-I9_AORTANEUR	1	55167773	0.0378	NA	0.785001	Aortic aneurysm || id:finn-b-I9_AORTANEUR	Aortic aneurysm	Aortic aneurysm || ||	TRUE	igd	1	NA	0.018	3.16804e-08	55167773	finn-b-E4_LIPOPROT	Disorders of lipoprotein metabolism and other lipidaemias || id:finn-b-E4_LIPOPROT	TRUE	reported	igd	1	TRUE
16	rs646776	T	C	T	C	0.148	0.0978	0.7856	0.7851	FALSE	FALSE	FALSE	finn-b-I9_AORTANEUR	1	109818530	0.0342	NA	0.00420504	Aortic aneurysm || id:finn-b-I9_AORTANEUR	Aortic aneurysm	Aortic aneurysm || ||	TRUE	igd	1	NA	0.0163	1.31492e-19	109818530	finn-b-E4_LIPOPROT	Disorders of lipoprotein metabolism and other lipidaemias || id:finn-b-E4_LIPOPROT	TRUE	reported	igd	1	TRUE
17	rs7412	T	C	T	C	-0.4034	-0.135	0.05343	0.05343	FALSE	FALSE	FALSE	finn-b-I9_AORTANEUR	19	45412079	0.062	NA	0.0293697	Aortic aneurysm || id:finn-b-I9_AORTANEUR	Aortic aneurysm	Aortic aneurysm || ||	TRUE	igd	19	NA	0.0307	1.91205e-39	45412079	finn-b-E4_LIPOPROT	Disorders of lipoprotein metabolism and other lipidaemias || id:finn-b-E4_LIPOPROT	TRUE	reported	igd	1	TRUE
18	rs74617384	T	A	T	A	0.2167	0.0843	0.04583	0.04551	FALSE	TRUE	FALSE	finn-b-I9_AORTANEUR	6	160997118	0.0672	NA	0.2096	Aortic aneurysm || id:finn-b-I9_AORTANEUR	Aortic aneurysm	Aortic aneurysm || ||	TRUE	igd	6	NA	0.0319	1.0311e-11	160997118	finn-b-E4_LIPOPROT	Disorders of lipoprotein metabolism and other lipidaemias || id:finn-b-E4_LIPOPROT	TRUE	reported	igd	1	TRUE
19	rs77645768	A	G	A	G	0.3141	-0.0165	0.02681	0.02673	FALSE	FALSE	FALSE	finn-b-I9_AORTANEUR	4	73668828	0.0881	NA	0.8515	Aortic aneurysm || id:finn-b-I9_AORTANEUR	Aortic aneurysm	Aortic aneurysm || ||	TRUE	igd	4	NA	0.0424	1.31704e-13	73668828	finn-b-E4_LIPOPROT	Disorders of lipoprotein metabolism and other lipidaemias || id:finn-b-E4_LIPOPROT	TRUE	reported	igd	1	TRUE
20	rs8106503	C	T	C	T	-0.2277	-0.002	0.1021	0.1023	FALSE	FALSE	FALSE	finn-b-I9_AORTANEUR	19	11196886	0.0467	NA	0.9661	Aortic aneurysm || id:finn-b-I9_AORTANEUR	Aortic aneurysm	Aortic aneurysm || ||	TRUE	igd	19	NA	0.0224	2.99571e-24	11196886	finn-b-E4_LIPOPROT	Disorders of lipoprotein metabolism and other lipidaemias || id:finn-b-E4_LIPOPROT	TRUE	reported	igd	1	TRUE
21	rs964184	C	G	C	G	-0.185	-0.0598	0.8541	0.8544	FALSE	TRUE	FALSE	finn-b-I9_AORTANEUR	11	116648917	0.0394	NA	0.1293	Aortic aneurysm || id:finn-b-I9_AORTANEUR	Aortic aneurysm	Aortic aneurysm || ||	TRUE	igd	11	NA	0.0189	1.61585e-22	116648917	finn-b-E4_LIPOPROT	Disorders of lipoprotein metabolism and other lipidaemias || id:finn-b-E4_LIPOPROT	TRUE	reported	igd	1	TRUE
22	rs9644859	A	G	A	G	0.0935	0.1096	0.4182	0.4174	FALSE	FALSE	FALSE	finn-b-I9_AORTANEUR	9	22090521	0.0283	NA	0.000109499	Aortic aneurysm || id:finn-b-I9_AORTANEUR	Aortic aneurysm	Aortic aneurysm || ||	TRUE	igd	9	NA	0.0134	3.49382e-12	22090521	finn-b-E4_LIPOPROT	Disorders of lipoprotein metabolism and other lipidaemias || id:finn-b-E4_LIPOPROT	TRUE	reported	igd	1	TRUE

## Sheet: Heart Failure
	SNP	effect_allele.exposure	other_allele.exposure	effect_allele.outcome	other_allele.outcome	beta.exposure	beta.outcome	eaf.exposure	eaf.outcome	remove	palindromic	ambiguous	id.outcome	chr	pos	se.outcome	samplesize.outcome	pval.outcome	outcome	originalname.outcome	outcome.deprecated	mr_keep.outcome	data_source.outcome	proxy.outcome	target_snp.outcome	proxy_snp.outcome	target_a1.outcome	target_a2.outcome	proxy_a1.outcome	proxy_a2.outcome	chr.exposure	samplesize.exposure	se.exposure	pval.exposure	pos.exposure	id.exposure	exposure	mr_keep.exposure	pval_origin.exposure	data_source.exposure	action	mr_keep
1	rs1135498	C	T	C	T	0.094	0.0104	0.2112	NA	FALSE	FALSE	FALSE	ebi-a-GCST009541	13	115052938	0.0165	977323	0.527499	Heart failure || id:ebi-a-GCST009541	Heart failure	Heart failure || ||	TRUE	igd	NA	NA	NA	NA	NA	NA	NA	13	NA	0.0165	1.32501e-08	115052938	finn-b-E4_LIPOPROT	Disorders of lipoprotein metabolism and other lipidaemias || id:finn-b-E4_LIPOPROT	TRUE	reported	igd	1	TRUE
2	rs114483871	T	C	T	C	0.2116	-0.0302	0.03571	NA	FALSE	FALSE	FALSE	ebi-a-GCST009541	4	73990168	0.0323	977323	0.3495	Heart failure || id:ebi-a-GCST009541	Heart failure	Heart failure || ||	TRUE	igd	NA	NA	NA	NA	NA	NA	NA	4	NA	0.0364	6.32295e-09	73990168	finn-b-E4_LIPOPROT	Disorders of lipoprotein metabolism and other lipidaemias || id:finn-b-E4_LIPOPROT	TRUE	reported	igd	1	TRUE
3	rs115478735	T	A	T	A	0.1251	0.0569	0.1974	NA	FALSE	TRUE	TRUE	ebi-a-GCST009541	9	136151806	0.0096	977323	3.67697e-09	Heart failure || id:ebi-a-GCST009541	Heart failure	Heart failure || ||	TRUE	igd	TRUE	rs115478735	rs600038	T	A	C	T	9	NA	0.0167	6.74062e-14	136149711	finn-b-E4_LIPOPROT	Disorders of lipoprotein metabolism and other lipidaemias || id:finn-b-E4_LIPOPROT	TRUE	reported	igd	1	TRUE
4	rs11591147	T	G	T	G	-0.4097	-0.0482	0.03607	NA	FALSE	FALSE	FALSE	ebi-a-GCST009541	1	55505647	0.0332	977323	0.1464	Heart failure || id:ebi-a-GCST009541	Heart failure	Heart failure || ||	TRUE	igd	NA	NA	NA	NA	NA	NA	NA	1	NA	0.0377	1.58891e-27	55505647	finn-b-E4_LIPOPROT	Disorders of lipoprotein metabolism and other lipidaemias || id:finn-b-E4_LIPOPROT	TRUE	reported	igd	1	TRUE
5	rs117113213	A	G	A	G	0.1487	0.014	0.06541	NA	FALSE	FALSE	FALSE	ebi-a-GCST009541	20	39165692	0.0236	977323	0.552699	Heart failure || id:ebi-a-GCST009541	Heart failure	Heart failure || ||	TRUE	igd	NA	NA	NA	NA	NA	NA	NA	20	NA	0.0271	4.091e-08	39165692	finn-b-E4_LIPOPROT	Disorders of lipoprotein metabolism and other lipidaemias || id:finn-b-E4_LIPOPROT	TRUE	reported	igd	1	TRUE
6	rs117733303	G	A	G	A	0.4282	0.1513	0.01135	NA	FALSE	FALSE	FALSE	ebi-a-GCST009541	6	160922870	0.029	977323	1.834e-07	Heart failure || id:ebi-a-GCST009541	Heart failure	Heart failure || ||	TRUE	igd	NA	NA	NA	NA	NA	NA	NA	6	NA	0.0644	2.86814e-11	160922870	finn-b-E4_LIPOPROT	Disorders of lipoprotein metabolism and other lipidaemias || id:finn-b-E4_LIPOPROT	TRUE	reported	igd	1	TRUE
7	rs12131840	T	C	T	C	0.1005	0.0125	0.1774	NA	FALSE	FALSE	FALSE	ebi-a-GCST009541	1	66231771	0.0113	977323	0.2665	Heart failure || id:ebi-a-GCST009541	Heart failure	Heart failure || ||	TRUE	igd	NA	NA	NA	NA	NA	NA	NA	1	NA	0.0175	8.49591e-09	66231771	finn-b-E4_LIPOPROT	Disorders of lipoprotein metabolism and other lipidaemias || id:finn-b-E4_LIPOPROT	TRUE	reported	igd	1	TRUE
8	rs12916	C	T	C	T	0.0802	0.0015	0.4537	NA	FALSE	FALSE	FALSE	ebi-a-GCST009541	5	74656539	0.0093	977323	0.8751	Heart failure || id:ebi-a-GCST009541	Heart failure	Heart failure || ||	TRUE	igd	NA	NA	NA	NA	NA	NA	NA	5	NA	0.0133	1.892e-09	74656539	finn-b-E4_LIPOPROT	Disorders of lipoprotein metabolism and other lipidaemias || id:finn-b-E4_LIPOPROT	TRUE	reported	igd	1	TRUE
9	rs1367117	A	G	A	G	0.1196	-0.0108	0.2812	NA	FALSE	FALSE	FALSE	ebi-a-GCST009541	2	21263900	0.0085	977323	0.2033	Heart failure || id:ebi-a-GCST009541	Heart failure	Heart failure || ||	TRUE	igd	NA	NA	NA	NA	NA	NA	NA	2	NA	0.0148	5.25049e-16	21263900	finn-b-E4_LIPOPROT	Disorders of lipoprotein metabolism and other lipidaemias || id:finn-b-E4_LIPOPROT	TRUE	reported	igd	1	TRUE
10	rs2954021	G	A	G	A	-0.0984	-0.0281	0.5364	NA	FALSE	FALSE	FALSE	ebi-a-GCST009541	8	126482077	0.0078	977323	0.000310099	Heart failure || id:ebi-a-GCST009541	Heart failure	Heart failure || ||	TRUE	igd	NA	NA	NA	NA	NA	NA	NA	8	NA	0.0133	1.34803e-13	126482077	finn-b-E4_LIPOPROT	Disorders of lipoprotein metabolism and other lipidaemias || id:finn-b-E4_LIPOPROT	TRUE	reported	igd	1	TRUE
11	rs41279633	T	G	T	G	0.0959	0.0104	0.2101	NA	FALSE	FALSE	FALSE	ebi-a-GCST009541	7	44580876	0.0107	977323	0.3345	Heart failure || id:ebi-a-GCST009541	Heart failure	Heart failure || ||	TRUE	igd	NA	NA	NA	NA	NA	NA	NA	7	NA	0.0163	4.495e-09	44580876	finn-b-E4_LIPOPROT	Disorders of lipoprotein metabolism and other lipidaemias || id:finn-b-E4_LIPOPROT	TRUE	reported	igd	1	TRUE
12	rs499883	A	G	A	G	0.1107	0.0193	0.5291	NA	FALSE	FALSE	FALSE	ebi-a-GCST009541	1	55519174	0.0082	977323	0.0184302	Heart failure || id:ebi-a-GCST009541	Heart failure	Heart failure || ||	TRUE	igd	NA	NA	NA	NA	NA	NA	NA	1	NA	0.0134	1.53815e-16	55519174	finn-b-E4_LIPOPROT	Disorders of lipoprotein metabolism and other lipidaemias || id:finn-b-E4_LIPOPROT	TRUE	reported	igd	1	TRUE
13	rs56132765	A	G	A	G	-0.1686	-0.0395	0.08221	NA	FALSE	FALSE	FALSE	ebi-a-GCST009541	2	44078853	0.0164	977323	0.0162099	Heart failure || id:ebi-a-GCST009541	Heart failure	Heart failure || ||	TRUE	igd	NA	NA	NA	NA	NA	NA	NA	2	NA	0.0243	4.40048e-12	44078853	finn-b-E4_LIPOPROT	Disorders of lipoprotein metabolism and other lipidaemias || id:finn-b-E4_LIPOPROT	TRUE	reported	igd	1	TRUE
14	rs646356	A	T	A	T	0.0993	0.0019	0.8319	NA	FALSE	TRUE	TRUE	ebi-a-GCST009541	1	55167773	0.0113	977323	0.8659	Heart failure || id:ebi-a-GCST009541	Heart failure	Heart failure || ||	TRUE	igd	NA	NA	NA	NA	NA	NA	NA	1	NA	0.018	3.16804e-08	55167773	finn-b-E4_LIPOPROT	Disorders of lipoprotein metabolism and other lipidaemias || id:finn-b-E4_LIPOPROT	TRUE	reported	igd	1	TRUE
15	rs646776	T	C	T	C	0.148	0.0581	0.7856	NA	FALSE	FALSE	FALSE	ebi-a-GCST009541	1	109818530	0.0096	977323	1.64999e-09	Heart failure || id:ebi-a-GCST009541	Heart failure	Heart failure || ||	TRUE	igd	NA	NA	NA	NA	NA	NA	NA	1	NA	0.0163	1.31492e-19	109818530	finn-b-E4_LIPOPROT	Disorders of lipoprotein metabolism and other lipidaemias || id:finn-b-E4_LIPOPROT	TRUE	reported	igd	1	TRUE
16	rs7412	T	C	T	C	-0.4034	-0.0051	0.05343	NA	FALSE	FALSE	FALSE	ebi-a-GCST009541	19	45412079	0.0154	977323	0.739399	Heart failure || id:ebi-a-GCST009541	Heart failure	Heart failure || ||	TRUE	igd	NA	NA	NA	NA	NA	NA	NA	19	NA	0.0307	1.91205e-39	45412079	finn-b-E4_LIPOPROT	Disorders of lipoprotein metabolism and other lipidaemias || id:finn-b-E4_LIPOPROT	TRUE	reported	igd	1	TRUE
17	rs74617384	T	A	T	A	0.2167	0.1045	0.04583	NA	FALSE	TRUE	TRUE	ebi-a-GCST009541	6	160997118	0.0159	977323	5.50427e-11	Heart failure || id:ebi-a-GCST009541	Heart failure	Heart failure || ||	TRUE	igd	NA	NA	NA	NA	NA	NA	NA	6	NA	0.0319	1.0311e-11	160997118	finn-b-E4_LIPOPROT	Disorders of lipoprotein metabolism and other lipidaemias || id:finn-b-E4_LIPOPROT	TRUE	reported	igd	1	TRUE
18	rs77645768	A	G	A	G	0.3141	0.033	0.02681	NA	FALSE	FALSE	FALSE	ebi-a-GCST009541	4	73668828	0.0303	977323	0.276	Heart failure || id:ebi-a-GCST009541	Heart failure	Heart failure || ||	TRUE	igd	NA	NA	NA	NA	NA	NA	NA	4	NA	0.0424	1.31704e-13	73668828	finn-b-E4_LIPOPROT	Disorders of lipoprotein metabolism and other lipidaemias || id:finn-b-E4_LIPOPROT	TRUE	reported	igd	1	TRUE
19	rs8106503	C	T	C	T	-0.2277	-0.0481	0.1021	NA	FALSE	FALSE	FALSE	ebi-a-GCST009541	19	11196886	0.0129	977323	0.000201002	Heart failure || id:ebi-a-GCST009541	Heart failure	Heart failure || ||	TRUE	igd	NA	NA	NA	NA	NA	NA	NA	19	NA	0.0224	2.99571e-24	11196886	finn-b-E4_LIPOPROT	Disorders of lipoprotein metabolism and other lipidaemias || id:finn-b-E4_LIPOPROT	TRUE	reported	igd	1	TRUE
20	rs964184	C	G	C	G	-0.185	-0.0405	0.8541	NA	FALSE	TRUE	TRUE	ebi-a-GCST009541	11	116648917	0.0115	977323	0.000423799	Heart failure || id:ebi-a-GCST009541	Heart failure	Heart failure || ||	TRUE	igd	NA	NA	NA	NA	NA	NA	NA	11	NA	0.0189	1.61585e-22	116648917	finn-b-E4_LIPOPROT	Disorders of lipoprotein metabolism and other lipidaemias || id:finn-b-E4_LIPOPROT	TRUE	reported	igd	1	TRUE
21	rs9644859	A	G	A	G	0.0935	0.046	0.4182	NA	FALSE	FALSE	FALSE	ebi-a-GCST009541	9	22090521	0.012	977323	0.0001299	Heart failure || id:ebi-a-GCST009541	Heart failure	Heart failure || ||	TRUE	igd	NA	NA	NA	NA	NA	NA	NA	9	NA	0.0134	3.49382e-12	22090521	finn-b-E4_LIPOPROT	Disorders of lipoprotein metabolism and other lipidaemias || id:finn-b-E4_LIPOPROT	TRUE	reported	igd	1	TRUE

## Sheet: AF
	SNP	effect_allele.exposure	other_allele.exposure	effect_allele.outcome	other_allele.outcome	beta.exposure	beta.outcome	eaf.exposure	eaf.outcome	remove	palindromic	ambiguous	id.outcome	chr	pos	se.outcome	samplesize.outcome	pval.outcome	outcome	originalname.outcome	outcome.deprecated	mr_keep.outcome	data_source.outcome	chr.exposure	samplesize.exposure	se.exposure	pval.exposure	pos.exposure	id.exposure	exposure	mr_keep.exposure	pval_origin.exposure	data_source.exposure	action	mr_keep
1	rs1135498	C	T	C	T	0.094	0.0011	0.2112	0.1963	FALSE	FALSE	FALSE	ebi-a-GCST006414	13	115052938	0.0136	1030836	0.9355	Atrial fibrillation || id:ebi-a-GCST006414	Atrial fibrillation	Atrial fibrillation || ||	TRUE	igd	13	NA	0.0165	1.32501e-08	115052938	finn-b-E4_LIPOPROT	Disorders of lipoprotein metabolism and other lipidaemias || id:finn-b-E4_LIPOPROT	TRUE	reported	igd	1	TRUE
2	rs114483871	T	C	T	C	0.2116	-0.0257	0.03571	0.0225	FALSE	FALSE	FALSE	ebi-a-GCST006414	4	73990168	0.0275	1030836	0.3497	Atrial fibrillation || id:ebi-a-GCST006414	Atrial fibrillation	Atrial fibrillation || ||	TRUE	igd	4	NA	0.0364	6.32295e-09	73990168	finn-b-E4_LIPOPROT	Disorders of lipoprotein metabolism and other lipidaemias || id:finn-b-E4_LIPOPROT	TRUE	reported	igd	1	TRUE
3	rs115478735	T	A	T	A	0.1251	0.0391	0.1974	0.1241	FALSE	TRUE	FALSE	ebi-a-GCST006414	9	136149711	0.0254	1030836	0.123	Atrial fibrillation || id:ebi-a-GCST006414	Atrial fibrillation	Atrial fibrillation || ||	TRUE	igd	9	NA	0.0167	6.74062e-14	136149711	finn-b-E4_LIPOPROT	Disorders of lipoprotein metabolism and other lipidaemias || id:finn-b-E4_LIPOPROT	TRUE	reported	igd	1	TRUE
4	rs11591147	T	G	T	G	-0.4097	-0.0362	0.03607	0.015	FALSE	FALSE	FALSE	ebi-a-GCST006414	1	55505647	0.0307	1030836	0.2376	Atrial fibrillation || id:ebi-a-GCST006414	Atrial fibrillation	Atrial fibrillation || ||	TRUE	igd	1	NA	0.0377	1.58891e-27	55505647	finn-b-E4_LIPOPROT	Disorders of lipoprotein metabolism and other lipidaemias || id:finn-b-E4_LIPOPROT	TRUE	reported	igd	1	TRUE
5	rs117113213	A	G	A	G	0.1487	-0.0132	0.06541	0.0378	FALSE	FALSE	FALSE	ebi-a-GCST006414	20	39165692	0.0204	1030836	0.516799	Atrial fibrillation || id:ebi-a-GCST006414	Atrial fibrillation	Atrial fibrillation || ||	TRUE	igd	20	NA	0.0271	4.091e-08	39165692	finn-b-E4_LIPOPROT	Disorders of lipoprotein metabolism and other lipidaemias || id:finn-b-E4_LIPOPROT	TRUE	reported	igd	1	TRUE
6	rs117733303	G	A	G	A	0.4282	0.0691	0.01135	0.0185	FALSE	FALSE	FALSE	ebi-a-GCST006414	6	160922870	0.0256	1030836	0.00701908	Atrial fibrillation || id:ebi-a-GCST006414	Atrial fibrillation	Atrial fibrillation || ||	TRUE	igd	6	NA	0.0644	2.86814e-11	160922870	finn-b-E4_LIPOPROT	Disorders of lipoprotein metabolism and other lipidaemias || id:finn-b-E4_LIPOPROT	TRUE	reported	igd	1	TRUE
7	rs12131840	T	C	T	C	0.1005	0.0191	0.1774	0.1436	FALSE	FALSE	FALSE	ebi-a-GCST006414	1	66231771	0.0098	1030836	0.0505697	Atrial fibrillation || id:ebi-a-GCST006414	Atrial fibrillation	Atrial fibrillation || ||	TRUE	igd	1	NA	0.0175	8.49591e-09	66231771	finn-b-E4_LIPOPROT	Disorders of lipoprotein metabolism and other lipidaemias || id:finn-b-E4_LIPOPROT	TRUE	reported	igd	1	TRUE
8	rs12916	C	T	C	T	0.0802	-0.0123	0.4537	0.4008	FALSE	FALSE	FALSE	ebi-a-GCST006414	5	74656539	0.0073	1030836	0.0942497	Atrial fibrillation || id:ebi-a-GCST006414	Atrial fibrillation	Atrial fibrillation || ||	TRUE	igd	5	NA	0.0133	1.892e-09	74656539	finn-b-E4_LIPOPROT	Disorders of lipoprotein metabolism and other lipidaemias || id:finn-b-E4_LIPOPROT	TRUE	reported	igd	1	TRUE
9	rs1367117	A	G	A	G	0.1196	-0.0092	0.2812	0.3405	FALSE	FALSE	FALSE	ebi-a-GCST006414	2	21263900	0.0071	1030836	0.1928	Atrial fibrillation || id:ebi-a-GCST006414	Atrial fibrillation	Atrial fibrillation || ||	TRUE	igd	2	NA	0.0148	5.25049e-16	21263900	finn-b-E4_LIPOPROT	Disorders of lipoprotein metabolism and other lipidaemias || id:finn-b-E4_LIPOPROT	TRUE	reported	igd	1	TRUE
10	rs182695896	C	A	C	A	0.2843	-0.0187	0.02581	0.0081	FALSE	FALSE	FALSE	ebi-a-GCST006414	4	74813227	0.0484	1030836	0.699301	Atrial fibrillation || id:ebi-a-GCST006414	Atrial fibrillation	Atrial fibrillation || ||	TRUE	igd	4	NA	0.0427	2.92415e-11	74813227	finn-b-E4_LIPOPROT	Disorders of lipoprotein metabolism and other lipidaemias || id:finn-b-E4_LIPOPROT	TRUE	reported	igd	1	TRUE
11	rs2954021	G	A	G	A	-0.0984	-0.0003	0.5364	0.5157	FALSE	FALSE	FALSE	ebi-a-GCST006414	8	126482077	0.0066	1030836	0.9617	Atrial fibrillation || id:ebi-a-GCST006414	Atrial fibrillation	Atrial fibrillation || ||	TRUE	igd	8	NA	0.0133	1.34803e-13	126482077	finn-b-E4_LIPOPROT	Disorders of lipoprotein metabolism and other lipidaemias || id:finn-b-E4_LIPOPROT	TRUE	reported	igd	1	TRUE
12	rs41279633	T	G	T	G	0.0959	0.0175	0.2101	0.1649	FALSE	FALSE	FALSE	ebi-a-GCST006414	7	44580876	0.0093	1030836	0.0586705	Atrial fibrillation || id:ebi-a-GCST006414	Atrial fibrillation	Atrial fibrillation || ||	TRUE	igd	7	NA	0.0163	4.495e-09	44580876	finn-b-E4_LIPOPROT	Disorders of lipoprotein metabolism and other lipidaemias || id:finn-b-E4_LIPOPROT	TRUE	reported	igd	1	TRUE
13	rs499883	A	G	A	G	0.1107	0.0099	0.5291	0.5872	FALSE	FALSE	FALSE	ebi-a-GCST006414	1	55519174	0.0071	1030836	0.1618	Atrial fibrillation || id:ebi-a-GCST006414	Atrial fibrillation	Atrial fibrillation || ||	TRUE	igd	1	NA	0.0134	1.53815e-16	55519174	finn-b-E4_LIPOPROT	Disorders of lipoprotein metabolism and other lipidaemias || id:finn-b-E4_LIPOPROT	TRUE	reported	igd	1	TRUE
14	rs56132765	A	G	A	G	-0.1686	0.0086	0.08221	0.0606	FALSE	FALSE	FALSE	ebi-a-GCST006414	2	44078853	0.0139	1030836	0.5363	Atrial fibrillation || id:ebi-a-GCST006414	Atrial fibrillation	Atrial fibrillation || ||	TRUE	igd	2	NA	0.0243	4.40048e-12	44078853	finn-b-E4_LIPOPROT	Disorders of lipoprotein metabolism and other lipidaemias || id:finn-b-E4_LIPOPROT	TRUE	reported	igd	1	TRUE
15	rs646356	A	T	A	T	0.0993	0.0152	0.8319	0.8291	FALSE	TRUE	FALSE	ebi-a-GCST006414	1	55167773	0.0098	1030836	0.1208	Atrial fibrillation || id:ebi-a-GCST006414	Atrial fibrillation	Atrial fibrillation || ||	TRUE	igd	1	NA	0.018	3.16804e-08	55167773	finn-b-E4_LIPOPROT	Disorders of lipoprotein metabolism and other lipidaemias || id:finn-b-E4_LIPOPROT	TRUE	reported	igd	1	TRUE
16	rs646776	T	C	T	C	0.148	0.0141	0.7856	0.7634	FALSE	FALSE	FALSE	ebi-a-GCST006414	1	109818530	0.008	1030836	0.0773001	Atrial fibrillation || id:ebi-a-GCST006414	Atrial fibrillation	Atrial fibrillation || ||	TRUE	igd	1	NA	0.0163	1.31492e-19	109818530	finn-b-E4_LIPOPROT	Disorders of lipoprotein metabolism and other lipidaemias || id:finn-b-E4_LIPOPROT	TRUE	reported	igd	1	TRUE
17	rs7412	T	C	T	C	-0.4034	-0.008	0.05343	0.0773	FALSE	FALSE	FALSE	ebi-a-GCST006414	19	45412079	0.0129	1030836	0.5363	Atrial fibrillation || id:ebi-a-GCST006414	Atrial fibrillation	Atrial fibrillation || ||	TRUE	igd	19	NA	0.0307	1.91205e-39	45412079	finn-b-E4_LIPOPROT	Disorders of lipoprotein metabolism and other lipidaemias || id:finn-b-E4_LIPOPROT	TRUE	reported	igd	1	TRUE
18	rs74617384	T	A	T	A	0.2167	0.0554	0.04583	0.0721	FALSE	TRUE	FALSE	ebi-a-GCST006414	6	160997118	0.0139	1030836	7.006e-05	Atrial fibrillation || id:ebi-a-GCST006414	Atrial fibrillation	Atrial fibrillation || ||	TRUE	igd	6	NA	0.0319	1.0311e-11	160997118	finn-b-E4_LIPOPROT	Disorders of lipoprotein metabolism and other lipidaemias || id:finn-b-E4_LIPOPROT	TRUE	reported	igd	1	TRUE
19	rs77645768	A	G	A	G	0.3141	-0.0014	0.02681	0.0228	FALSE	FALSE	FALSE	ebi-a-GCST006414	4	73668828	0.0268	1030836	0.9581	Atrial fibrillation || id:ebi-a-GCST006414	Atrial fibrillation	Atrial fibrillation || ||	TRUE	igd	4	NA	0.0424	1.31704e-13	73668828	finn-b-E4_LIPOPROT	Disorders of lipoprotein metabolism and other lipidaemias || id:finn-b-E4_LIPOPROT	TRUE	reported	igd	1	TRUE
20	rs8106503	C	T	C	T	-0.2277	0.0011	0.1021	0.1112	FALSE	FALSE	FALSE	ebi-a-GCST006414	19	11196886	0.0108	1030836	0.92	Atrial fibrillation || id:ebi-a-GCST006414	Atrial fibrillation	Atrial fibrillation || ||	TRUE	igd	19	NA	0.0224	2.99571e-24	11196886	finn-b-E4_LIPOPROT	Disorders of lipoprotein metabolism and other lipidaemias || id:finn-b-E4_LIPOPROT	TRUE	reported	igd	1	TRUE
21	rs964184	C	G	C	G	-0.185	-0.0003	0.8541	0.8453	FALSE	TRUE	FALSE	ebi-a-GCST006414	11	116648917	0.0096	1030836	0.9739	Atrial fibrillation || id:ebi-a-GCST006414	Atrial fibrillation	Atrial fibrillation || ||	TRUE	igd	11	NA	0.0189	1.61585e-22	116648917	finn-b-E4_LIPOPROT	Disorders of lipoprotein metabolism and other lipidaemias || id:finn-b-E4_LIPOPROT	TRUE	reported	igd	1	TRUE
22	rs9644859	A	G	A	G	0.0935	0.0163	0.4182	0.4565	FALSE	FALSE	FALSE	ebi-a-GCST006414	9	22090521	0.0094	1030836	0.0827294	Atrial fibrillation || id:ebi-a-GCST006414	Atrial fibrillation	Atrial fibrillation || ||	TRUE	igd	9	NA	0.0134	3.49382e-12	22090521	finn-b-E4_LIPOPROT	Disorders of lipoprotein metabolism and other lipidaemias || id:finn-b-E4_LIPOPROT	TRUE	reported	igd	1	TRUE

## Sheet: Hypertension
	SNP	effect_allele.exposure	other_allele.exposure	effect_allele.outcome	other_allele.outcome	beta.exposure	beta.outcome	eaf.exposure	eaf.outcome	remove	palindromic	ambiguous	id.outcome	chr	pos	se.outcome	samplesize.outcome	pval.outcome	outcome	originalname.outcome	outcome.deprecated	mr_keep.outcome	data_source.outcome	proxy.outcome	target_snp.outcome	proxy_snp.outcome	target_a1.outcome	target_a2.outcome	proxy_a1.outcome	proxy_a2.outcome	chr.exposure	samplesize.exposure	se.exposure	pval.exposure	pos.exposure	id.exposure	exposure	mr_keep.exposure	pval_origin.exposure	data_source.exposure	action	mr_keep
1	rs114483871	T	C	T	C	0.2116	0.000896308	0.03571	0.023462	FALSE	FALSE	FALSE	ukb-b-12493	4	73990168	0.00226403	463010	0.69	Diagnoses - secondary ICD10: I10 Essential (primary) hypertension || id:ukb-b-12493	Diagnoses - secondary ICD10: I10 Essential (primary) hypertension	Diagnoses - secondary ICD10: I10 Essential (primary) hypertension || ||	TRUE	igd	NA	NA	NA	NA	NA	NA	NA	4	NA	0.0364	6.32295e-09	73990168	finn-b-E4_LIPOPROT	Disorders of lipoprotein metabolism and other lipidaemias || id:finn-b-E4_LIPOPROT	TRUE	reported	igd	1	TRUE
2	rs115478735	T	A	T	A	0.1251	-0.00103083	0.1974	0.207045	FALSE	TRUE	FALSE	ukb-b-12493	9	136151806	0.000821255	463010	0.21	Diagnoses - secondary ICD10: I10 Essential (primary) hypertension || id:ukb-b-12493	Diagnoses - secondary ICD10: I10 Essential (primary) hypertension	Diagnoses - secondary ICD10: I10 Essential (primary) hypertension || ||	TRUE	igd	TRUE	rs115478735	rs600038	T	A	C	T	9	NA	0.0167	6.74062e-14	136149711	finn-b-E4_LIPOPROT	Disorders of lipoprotein metabolism and other lipidaemias || id:finn-b-E4_LIPOPROT	TRUE	reported	igd	1	TRUE
3	rs11591147	T	G	T	G	-0.4097	0.000213642	0.03607	0.017453	FALSE	FALSE	FALSE	ukb-b-12493	1	55505647	0.00254035	463010	0.93	Diagnoses - secondary ICD10: I10 Essential (primary) hypertension || id:ukb-b-12493	Diagnoses - secondary ICD10: I10 Essential (primary) hypertension	Diagnoses - secondary ICD10: I10 Essential (primary) hypertension || ||	TRUE	igd	NA	NA	NA	NA	NA	NA	NA	1	NA	0.0377	1.58891e-27	55505647	finn-b-E4_LIPOPROT	Disorders of lipoprotein metabolism and other lipidaemias || id:finn-b-E4_LIPOPROT	TRUE	reported	igd	1	TRUE
4	rs117113213	A	G	A	G	0.1487	0.00161047	0.06541	0.032669	FALSE	FALSE	FALSE	ukb-b-12493	20	39165692	0.00189409	463010	0.4	Diagnoses - secondary ICD10: I10 Essential (primary) hypertension || id:ukb-b-12493	Diagnoses - secondary ICD10: I10 Essential (primary) hypertension	Diagnoses - secondary ICD10: I10 Essential (primary) hypertension || ||	TRUE	igd	NA	NA	NA	NA	NA	NA	NA	20	NA	0.0271	4.091e-08	39165692	finn-b-E4_LIPOPROT	Disorders of lipoprotein metabolism and other lipidaemias || id:finn-b-E4_LIPOPROT	TRUE	reported	igd	1	TRUE
5	rs117733303	G	A	G	A	0.4282	0.0124609	0.01135	0.01841	FALSE	FALSE	FALSE	ukb-b-12493	6	160922870	0.00247351	463010	4.70002e-07	Diagnoses - secondary ICD10: I10 Essential (primary) hypertension || id:ukb-b-12493	Diagnoses - secondary ICD10: I10 Essential (primary) hypertension	Diagnoses - secondary ICD10: I10 Essential (primary) hypertension || ||	TRUE	igd	NA	NA	NA	NA	NA	NA	NA	6	NA	0.0644	2.86814e-11	160922870	finn-b-E4_LIPOPROT	Disorders of lipoprotein metabolism and other lipidaemias || id:finn-b-E4_LIPOPROT	TRUE	reported	igd	1	TRUE
6	rs12131840	T	C	T	C	0.1005	0.000780211	0.1774	0.128874	FALSE	FALSE	FALSE	ukb-b-12493	1	66231771	0.00100483	463010	0.44	Diagnoses - secondary ICD10: I10 Essential (primary) hypertension || id:ukb-b-12493	Diagnoses - secondary ICD10: I10 Essential (primary) hypertension	Diagnoses - secondary ICD10: I10 Essential (primary) hypertension || ||	TRUE	igd	NA	NA	NA	NA	NA	NA	NA	1	NA	0.0175	8.49591e-09	66231771	finn-b-E4_LIPOPROT	Disorders of lipoprotein metabolism and other lipidaemias || id:finn-b-E4_LIPOPROT	TRUE	reported	igd	1	TRUE
7	rs12916	C	T	C	T	0.0802	0.00046375	0.4537	0.400545	FALSE	FALSE	FALSE	ukb-b-12493	5	74656539	0.000679173	463010	0.49	Diagnoses - secondary ICD10: I10 Essential (primary) hypertension || id:ukb-b-12493	Diagnoses - secondary ICD10: I10 Essential (primary) hypertension	Diagnoses - secondary ICD10: I10 Essential (primary) hypertension || ||	TRUE	igd	NA	NA	NA	NA	NA	NA	NA	5	NA	0.0133	1.892e-09	74656539	finn-b-E4_LIPOPROT	Disorders of lipoprotein metabolism and other lipidaemias || id:finn-b-E4_LIPOPROT	TRUE	reported	igd	1	TRUE
8	rs1367117	A	G	A	G	0.1196	6.9588e-05	0.2812	0.335116	FALSE	FALSE	FALSE	ukb-b-12493	2	21263900	0.000704103	463010	0.92	Diagnoses - secondary ICD10: I10 Essential (primary) hypertension || id:ukb-b-12493	Diagnoses - secondary ICD10: I10 Essential (primary) hypertension	Diagnoses - secondary ICD10: I10 Essential (primary) hypertension || ||	TRUE	igd	NA	NA	NA	NA	NA	NA	NA	2	NA	0.0148	5.25049e-16	21263900	finn-b-E4_LIPOPROT	Disorders of lipoprotein metabolism and other lipidaemias || id:finn-b-E4_LIPOPROT	TRUE	reported	igd	1	TRUE
9	rs182695896	C	A	C	A	0.2843	0.00241704	0.02581	0.009643	FALSE	FALSE	FALSE	ukb-b-12493	4	74813227	0.00347912	463010	0.49	Diagnoses - secondary ICD10: I10 Essential (primary) hypertension || id:ukb-b-12493	Diagnoses - secondary ICD10: I10 Essential (primary) hypertension	Diagnoses - secondary ICD10: I10 Essential (primary) hypertension || ||	TRUE	igd	NA	NA	NA	NA	NA	NA	NA	4	NA	0.0427	2.92415e-11	74813227	finn-b-E4_LIPOPROT	Disorders of lipoprotein metabolism and other lipidaemias || id:finn-b-E4_LIPOPROT	TRUE	reported	igd	1	TRUE
10	rs2954021	G	A	G	A	-0.0984	-0.000565662	0.5364	0.504574	FALSE	FALSE	FALSE	ukb-b-12493	8	126482077	0.000665723	463010	0.4	Diagnoses - secondary ICD10: I10 Essential (primary) hypertension || id:ukb-b-12493	Diagnoses - secondary ICD10: I10 Essential (primary) hypertension	Diagnoses - secondary ICD10: I10 Essential (primary) hypertension || ||	TRUE	igd	NA	NA	NA	NA	NA	NA	NA	8	NA	0.0133	1.34803e-13	126482077	finn-b-E4_LIPOPROT	Disorders of lipoprotein metabolism and other lipidaemias || id:finn-b-E4_LIPOPROT	TRUE	reported	igd	1	TRUE
11	rs41279633	T	G	T	G	0.0959	0.00172246	0.2101	0.154594	FALSE	FALSE	FALSE	ukb-b-12493	7	44580876	0.000921786	463010	0.0619998	Diagnoses - secondary ICD10: I10 Essential (primary) hypertension || id:ukb-b-12493	Diagnoses - secondary ICD10: I10 Essential (primary) hypertension	Diagnoses - secondary ICD10: I10 Essential (primary) hypertension || ||	TRUE	igd	NA	NA	NA	NA	NA	NA	NA	7	NA	0.0163	4.495e-09	44580876	finn-b-E4_LIPOPROT	Disorders of lipoprotein metabolism and other lipidaemias || id:finn-b-E4_LIPOPROT	TRUE	reported	igd	1	TRUE
12	rs499883	A	G	A	G	0.1107	-0.000168094	0.5291	0.614578	FALSE	FALSE	FALSE	ukb-b-12493	1	55519174	0.000697103	463010	0.81	Diagnoses - secondary ICD10: I10 Essential (primary) hypertension || id:ukb-b-12493	Diagnoses - secondary ICD10: I10 Essential (primary) hypertension	Diagnoses - secondary ICD10: I10 Essential (primary) hypertension || ||	TRUE	igd	NA	NA	NA	NA	NA	NA	NA	1	NA	0.0134	1.53815e-16	55519174	finn-b-E4_LIPOPROT	Disorders of lipoprotein metabolism and other lipidaemias || id:finn-b-E4_LIPOPROT	TRUE	reported	igd	1	TRUE
13	rs56132765	A	G	A	G	-0.1686	0.000890692	0.08221	0.061219	FALSE	FALSE	FALSE	ukb-b-12493	2	44078853	0.00138923	463010	0.52	Diagnoses - secondary ICD10: I10 Essential (primary) hypertension || id:ukb-b-12493	Diagnoses - secondary ICD10: I10 Essential (primary) hypertension	Diagnoses - secondary ICD10: I10 Essential (primary) hypertension || ||	TRUE	igd	NA	NA	NA	NA	NA	NA	NA	2	NA	0.0243	4.40048e-12	44078853	finn-b-E4_LIPOPROT	Disorders of lipoprotein metabolism and other lipidaemias || id:finn-b-E4_LIPOPROT	TRUE	reported	igd	1	TRUE
14	rs646356	A	T	A	T	0.0993	-0.000496064	0.8319	0.84211	FALSE	TRUE	FALSE	ukb-b-12493	1	55167773	0.000946556	463010	0.6	Diagnoses - secondary ICD10: I10 Essential (primary) hypertension || id:ukb-b-12493	Diagnoses - secondary ICD10: I10 Essential (primary) hypertension	Diagnoses - secondary ICD10: I10 Essential (primary) hypertension || ||	TRUE	igd	NA	NA	NA	NA	NA	NA	NA	1	NA	0.018	3.16804e-08	55167773	finn-b-E4_LIPOPROT	Disorders of lipoprotein metabolism and other lipidaemias || id:finn-b-E4_LIPOPROT	TRUE	reported	igd	1	TRUE
15	rs646776	T	C	T	C	0.148	0.00253205	0.7856	0.777917	FALSE	FALSE	FALSE	ukb-b-12493	1	109818530	0.000799928	463010	0.0015	Diagnoses - secondary ICD10: I10 Essential (primary) hypertension || id:ukb-b-12493	Diagnoses - secondary ICD10: I10 Essential (primary) hypertension	Diagnoses - secondary ICD10: I10 Essential (primary) hypertension || ||	TRUE	igd	NA	NA	NA	NA	NA	NA	NA	1	NA	0.0163	1.31492e-19	109818530	finn-b-E4_LIPOPROT	Disorders of lipoprotein metabolism and other lipidaemias || id:finn-b-E4_LIPOPROT	TRUE	reported	igd	1	TRUE
16	rs7412	T	C	T	C	-0.4034	-0.0045285	0.05343	0.080155	FALSE	FALSE	FALSE	ukb-b-12493	19	45412079	0.00122692	463010	0.000219999	Diagnoses - secondary ICD10: I10 Essential (primary) hypertension || id:ukb-b-12493	Diagnoses - secondary ICD10: I10 Essential (primary) hypertension	Diagnoses - secondary ICD10: I10 Essential (primary) hypertension || ||	TRUE	igd	NA	NA	NA	NA	NA	NA	NA	19	NA	0.0307	1.91205e-39	45412079	finn-b-E4_LIPOPROT	Disorders of lipoprotein metabolism and other lipidaemias || id:finn-b-E4_LIPOPROT	TRUE	reported	igd	1	TRUE
17	rs74617384	T	A	T	A	0.2167	0.00759089	0.04583	0.078762	FALSE	TRUE	FALSE	ukb-b-12493	6	160997118	0.00123542	463010	8e-10	Diagnoses - secondary ICD10: I10 Essential (primary) hypertension || id:ukb-b-12493	Diagnoses - secondary ICD10: I10 Essential (primary) hypertension	Diagnoses - secondary ICD10: I10 Essential (primary) hypertension || ||	TRUE	igd	NA	NA	NA	NA	NA	NA	NA	6	NA	0.0319	1.0311e-11	160997118	finn-b-E4_LIPOPROT	Disorders of lipoprotein metabolism and other lipidaemias || id:finn-b-E4_LIPOPROT	TRUE	reported	igd	1	TRUE
18	rs77645768	A	G	A	G	0.3141	-0.000725722	0.02681	0.025199	FALSE	FALSE	FALSE	ukb-b-12493	4	73668828	0.00221719	463010	0.74	Diagnoses - secondary ICD10: I10 Essential (primary) hypertension || id:ukb-b-12493	Diagnoses - secondary ICD10: I10 Essential (primary) hypertension	Diagnoses - secondary ICD10: I10 Essential (primary) hypertension || ||	TRUE	igd	NA	NA	NA	NA	NA	NA	NA	4	NA	0.0424	1.31704e-13	73668828	finn-b-E4_LIPOPROT	Disorders of lipoprotein metabolism and other lipidaemias || id:finn-b-E4_LIPOPROT	TRUE	reported	igd	1	TRUE
19	rs8106503	C	T	C	T	-0.2277	-0.0033697	0.1021	0.11754	FALSE	FALSE	FALSE	ukb-b-12493	19	11196886	0.00103519	463010	0.00109999	Diagnoses - secondary ICD10: I10 Essential (primary) hypertension || id:ukb-b-12493	Diagnoses - secondary ICD10: I10 Essential (primary) hypertension	Diagnoses - secondary ICD10: I10 Essential (primary) hypertension || ||	TRUE	igd	NA	NA	NA	NA	NA	NA	NA	19	NA	0.0224	2.99571e-24	11196886	finn-b-E4_LIPOPROT	Disorders of lipoprotein metabolism and other lipidaemias || id:finn-b-E4_LIPOPROT	TRUE	reported	igd	1	TRUE
20	rs964184	C	G	C	G	-0.185	-0.0029399	0.8541	0.866369	FALSE	TRUE	FALSE	ukb-b-12493	11	116648917	0.000977875	463010	0.00259998	Diagnoses - secondary ICD10: I10 Essential (primary) hypertension || id:ukb-b-12493	Diagnoses - secondary ICD10: I10 Essential (primary) hypertension	Diagnoses - secondary ICD10: I10 Essential (primary) hypertension || ||	TRUE	igd	NA	NA	NA	NA	NA	NA	NA	11	NA	0.0189	1.61585e-22	116648917	finn-b-E4_LIPOPROT	Disorders of lipoprotein metabolism and other lipidaemias || id:finn-b-E4_LIPOPROT	TRUE	reported	igd	1	TRUE
21	rs9644859	A	G	A	G	0.0935	0.0032588	0.4182	0.49005	FALSE	FALSE	FALSE	ukb-b-12493	9	22098574	0.000665099	463010	9.59997e-07	Diagnoses - secondary ICD10: I10 Essential (primary) hypertension || id:ukb-b-12493	Diagnoses - secondary ICD10: I10 Essential (primary) hypertension	Diagnoses - secondary ICD10: I10 Essential (primary) hypertension || ||	TRUE	igd	TRUE	rs9644859	rs4977574	A	G	G	A	9	NA	0.0134	3.49382e-12	22090521	finn-b-E4_LIPOPROT	Disorders of lipoprotein metabolism and other lipidaemias || id:finn-b-E4_LIPOPROT	TRUE	reported	igd	1	TRUE

## Sheet: Old myocardial infarction
	SNP	effect_allele.exposure	other_allele.exposure	effect_allele.outcome	other_allele.outcome	beta.exposure	beta.outcome	eaf.exposure	eaf.outcome	remove	palindromic	ambiguous	id.outcome	chr	pos	se.outcome	samplesize.outcome	pval.outcome	outcome	originalname.outcome	outcome.deprecated	mr_keep.outcome	data_source.outcome	proxy.outcome	target_snp.outcome	proxy_snp.outcome	target_a1.outcome	target_a2.outcome	proxy_a1.outcome	proxy_a2.outcome	chr.exposure	samplesize.exposure	se.exposure	pval.exposure	pos.exposure	id.exposure	exposure	mr_keep.exposure	pval_origin.exposure	data_source.exposure	action	mr_keep
1	rs115478735	T	A	T	A	0.1251	0.000341881	0.1974	0.207045	FALSE	TRUE	FALSE	ukb-b-16662	9	136151806	0.000216717	463010	0.11	Diagnoses - secondary ICD10: I25.2 Old myocardial infarction || id:ukb-b-16662	Diagnoses - secondary ICD10: I25.2 Old myocardial infarction	Diagnoses - secondary ICD10: I25.2 Old myocardial infarction || ||	TRUE	igd	TRUE	rs115478735	rs600038	T	A	C	T	9	NA	0.0167	6.74062e-14	136149711	finn-b-E4_LIPOPROT	Disorders of lipoprotein metabolism and other lipidaemias || id:finn-b-E4_LIPOPROT	TRUE	reported	igd	1	TRUE
2	rs12131840	T	C	T	C	0.1005	0.000432113	0.1774	0.128874	FALSE	FALSE	FALSE	ukb-b-16662	1	66231771	0.000265266	463010	0.1	Diagnoses - secondary ICD10: I25.2 Old myocardial infarction || id:ukb-b-16662	Diagnoses - secondary ICD10: I25.2 Old myocardial infarction	Diagnoses - secondary ICD10: I25.2 Old myocardial infarction || ||	TRUE	igd	NA	NA	NA	NA	NA	NA	NA	1	NA	0.0175	8.49591e-09	66231771	finn-b-E4_LIPOPROT	Disorders of lipoprotein metabolism and other lipidaemias || id:finn-b-E4_LIPOPROT	TRUE	reported	igd	1	TRUE
3	rs12916	C	T	C	T	0.0802	-0.000101382	0.4537	0.400545	FALSE	FALSE	FALSE	ukb-b-16662	5	74656539	0.000179277	463010	0.57	Diagnoses - secondary ICD10: I25.2 Old myocardial infarction || id:ukb-b-16662	Diagnoses - secondary ICD10: I25.2 Old myocardial infarction	Diagnoses - secondary ICD10: I25.2 Old myocardial infarction || ||	TRUE	igd	NA	NA	NA	NA	NA	NA	NA	5	NA	0.0133	1.892e-09	74656539	finn-b-E4_LIPOPROT	Disorders of lipoprotein metabolism and other lipidaemias || id:finn-b-E4_LIPOPROT	TRUE	reported	igd	1	TRUE
4	rs1367117	A	G	A	G	0.1196	0.000292059	0.2812	0.335116	FALSE	FALSE	FALSE	ukb-b-16662	2	21263900	0.000185883	463010	0.12	Diagnoses - secondary ICD10: I25.2 Old myocardial infarction || id:ukb-b-16662	Diagnoses - secondary ICD10: I25.2 Old myocardial infarction	Diagnoses - secondary ICD10: I25.2 Old myocardial infarction || ||	TRUE	igd	NA	NA	NA	NA	NA	NA	NA	2	NA	0.0148	5.25049e-16	21263900	finn-b-E4_LIPOPROT	Disorders of lipoprotein metabolism and other lipidaemias || id:finn-b-E4_LIPOPROT	TRUE	reported	igd	1	TRUE
5	rs2954021	G	A	G	A	-0.0984	-0.000356487	0.5364	0.504574	FALSE	FALSE	FALSE	ukb-b-16662	8	126482077	0.000175682	463010	0.0420001	Diagnoses - secondary ICD10: I25.2 Old myocardial infarction || id:ukb-b-16662	Diagnoses - secondary ICD10: I25.2 Old myocardial infarction	Diagnoses - secondary ICD10: I25.2 Old myocardial infarction || ||	TRUE	igd	NA	NA	NA	NA	NA	NA	NA	8	NA	0.0133	1.34803e-13	126482077	finn-b-E4_LIPOPROT	Disorders of lipoprotein metabolism and other lipidaemias || id:finn-b-E4_LIPOPROT	TRUE	reported	igd	1	TRUE
6	rs41279633	T	G	T	G	0.0959	9.48031e-05	0.2101	0.154594	FALSE	FALSE	FALSE	ukb-b-16662	7	44580876	0.000243279	463010	0.7	Diagnoses - secondary ICD10: I25.2 Old myocardial infarction || id:ukb-b-16662	Diagnoses - secondary ICD10: I25.2 Old myocardial infarction	Diagnoses - secondary ICD10: I25.2 Old myocardial infarction || ||	TRUE	igd	NA	NA	NA	NA	NA	NA	NA	7	NA	0.0163	4.495e-09	44580876	finn-b-E4_LIPOPROT	Disorders of lipoprotein metabolism and other lipidaemias || id:finn-b-E4_LIPOPROT	TRUE	reported	igd	1	TRUE
7	rs499883	A	G	A	G	0.1107	0.000265777	0.5291	0.614578	FALSE	FALSE	FALSE	ukb-b-16662	1	55519174	0.000184029	463010	0.15	Diagnoses - secondary ICD10: I25.2 Old myocardial infarction || id:ukb-b-16662	Diagnoses - secondary ICD10: I25.2 Old myocardial infarction	Diagnoses - secondary ICD10: I25.2 Old myocardial infarction || ||	TRUE	igd	NA	NA	NA	NA	NA	NA	NA	1	NA	0.0134	1.53815e-16	55519174	finn-b-E4_LIPOPROT	Disorders of lipoprotein metabolism and other lipidaemias || id:finn-b-E4_LIPOPROT	TRUE	reported	igd	1	TRUE
8	rs646356	A	T	A	T	0.0993	-8.92289e-05	0.8319	0.84211	FALSE	TRUE	FALSE	ukb-b-16662	1	55167773	0.000249882	463010	0.719999	Diagnoses - secondary ICD10: I25.2 Old myocardial infarction || id:ukb-b-16662	Diagnoses - secondary ICD10: I25.2 Old myocardial infarction	Diagnoses - secondary ICD10: I25.2 Old myocardial infarction || ||	TRUE	igd	NA	NA	NA	NA	NA	NA	NA	1	NA	0.018	3.16804e-08	55167773	finn-b-E4_LIPOPROT	Disorders of lipoprotein metabolism and other lipidaemias || id:finn-b-E4_LIPOPROT	TRUE	reported	igd	1	TRUE
9	rs646776	T	C	T	C	0.148	0.00122947	0.7856	0.777917	FALSE	FALSE	FALSE	ukb-b-16662	1	109818530	0.000211174	463010	5.80003e-09	Diagnoses - secondary ICD10: I25.2 Old myocardial infarction || id:ukb-b-16662	Diagnoses - secondary ICD10: I25.2 Old myocardial infarction	Diagnoses - secondary ICD10: I25.2 Old myocardial infarction || ||	TRUE	igd	NA	NA	NA	NA	NA	NA	NA	1	NA	0.0163	1.31492e-19	109818530	finn-b-E4_LIPOPROT	Disorders of lipoprotein metabolism and other lipidaemias || id:finn-b-E4_LIPOPROT	TRUE	reported	igd	1	TRUE
10	rs8106503	C	T	C	T	-0.2277	-0.000845815	0.1021	0.11754	FALSE	FALSE	FALSE	ukb-b-16662	19	11196886	0.000273137	463010	0.002	Diagnoses - secondary ICD10: I25.2 Old myocardial infarction || id:ukb-b-16662	Diagnoses - secondary ICD10: I25.2 Old myocardial infarction	Diagnoses - secondary ICD10: I25.2 Old myocardial infarction || ||	TRUE	igd	NA	NA	NA	NA	NA	NA	NA	19	NA	0.0224	2.99571e-24	11196886	finn-b-E4_LIPOPROT	Disorders of lipoprotein metabolism and other lipidaemias || id:finn-b-E4_LIPOPROT	TRUE	reported	igd	1	TRUE
11	rs964184	C	G	C	G	-0.185	-0.000349221	0.8541	0.866369	FALSE	TRUE	FALSE	ukb-b-16662	11	116648917	0.000258092	463010	0.18	Diagnoses - secondary ICD10: I25.2 Old myocardial infarction || id:ukb-b-16662	Diagnoses - secondary ICD10: I25.2 Old myocardial infarction	Diagnoses - secondary ICD10: I25.2 Old myocardial infarction || ||	TRUE	igd	NA	NA	NA	NA	NA	NA	NA	11	NA	0.0189	1.61585e-22	116648917	finn-b-E4_LIPOPROT	Disorders of lipoprotein metabolism and other lipidaemias || id:finn-b-E4_LIPOPROT	TRUE	reported	igd	1	TRUE
12	rs9644859	A	G	A	G	0.0935	0.00159967	0.4182	0.49005	FALSE	FALSE	FALSE	ukb-b-16662	9	22098574	0.00017551	463010	7.89951e-20	Diagnoses - secondary ICD10: I25.2 Old myocardial infarction || id:ukb-b-16662	Diagnoses - secondary ICD10: I25.2 Old myocardial infarction	Diagnoses - secondary ICD10: I25.2 Old myocardial infarction || ||	TRUE	igd	TRUE	rs9644859	rs4977574	A	G	G	A	9	NA	0.0134	3.49382e-12	22090521	finn-b-E4_LIPOPROT	Disorders of lipoprotein metabolism and other lipidaemias || id:finn-b-E4_LIPOPROT	TRUE	reported	igd	1	TRUE

## Sheet: Acute myocardial infarction 
	SNP	effect_allele.exposure	other_allele.exposure	effect_allele.outcome	other_allele.outcome	beta.exposure	beta.outcome	eaf.exposure	eaf.outcome	remove	palindromic	ambiguous	id.outcome	chr	pos	se.outcome	samplesize.outcome	pval.outcome	outcome	originalname.outcome	outcome.deprecated	mr_keep.outcome	data_source.outcome	proxy.outcome	target_snp.outcome	proxy_snp.outcome	target_a1.outcome	target_a2.outcome	proxy_a1.outcome	proxy_a2.outcome	chr.exposure	samplesize.exposure	se.exposure	pval.exposure	pos.exposure	id.exposure	exposure	mr_keep.exposure	pval_origin.exposure	data_source.exposure	action	mr_keep
1	rs115478735	T	A	T	A	0.1251	0.000349458	0.1974	0.207045	FALSE	TRUE	FALSE	ukb-b-3469	9	136151806	0.000180958	463010	0.0530005	Diagnoses - main ICD10: I21.9 Acute myocardial infarction, unspecified || id:ukb-b-3469	Diagnoses - main ICD10: I21.9 Acute myocardial infarction, unspecified	Diagnoses - main ICD10: I21.9 Acute myocardial infarction, unspecified || ||	TRUE	igd	TRUE	rs115478735	rs600038	T	A	C	T	9	NA	0.0167	6.74062e-14	136149711	finn-b-E4_LIPOPROT	Disorders of lipoprotein metabolism and other lipidaemias || id:finn-b-E4_LIPOPROT	TRUE	reported	igd	1	TRUE
2	rs12916	C	T	C	T	0.0802	1.97149e-05	0.4537	0.400545	FALSE	FALSE	FALSE	ukb-b-3469	5	74656539	0.000149694	463010	0.9	Diagnoses - main ICD10: I21.9 Acute myocardial infarction, unspecified || id:ukb-b-3469	Diagnoses - main ICD10: I21.9 Acute myocardial infarction, unspecified	Diagnoses - main ICD10: I21.9 Acute myocardial infarction, unspecified || ||	TRUE	igd	NA	NA	NA	NA	NA	NA	NA	5	NA	0.0133	1.892e-09	74656539	finn-b-E4_LIPOPROT	Disorders of lipoprotein metabolism and other lipidaemias || id:finn-b-E4_LIPOPROT	TRUE	reported	igd	1	TRUE
3	rs1367117	A	G	A	G	0.1196	4.97531e-05	0.2812	0.335116	FALSE	FALSE	FALSE	ukb-b-3469	2	21263900	0.000155215	463010	0.75	Diagnoses - main ICD10: I21.9 Acute myocardial infarction, unspecified || id:ukb-b-3469	Diagnoses - main ICD10: I21.9 Acute myocardial infarction, unspecified	Diagnoses - main ICD10: I21.9 Acute myocardial infarction, unspecified || ||	TRUE	igd	NA	NA	NA	NA	NA	NA	NA	2	NA	0.0148	5.25049e-16	21263900	finn-b-E4_LIPOPROT	Disorders of lipoprotein metabolism and other lipidaemias || id:finn-b-E4_LIPOPROT	TRUE	reported	igd	1	TRUE
4	rs2954021	G	A	G	A	-0.0984	-0.000219999	0.5364	0.504574	FALSE	FALSE	FALSE	ukb-b-3469	8	126482077	0.000146692	463010	0.13	Diagnoses - main ICD10: I21.9 Acute myocardial infarction, unspecified || id:ukb-b-3469	Diagnoses - main ICD10: I21.9 Acute myocardial infarction, unspecified	Diagnoses - main ICD10: I21.9 Acute myocardial infarction, unspecified || ||	TRUE	igd	NA	NA	NA	NA	NA	NA	NA	8	NA	0.0133	1.34803e-13	126482077	finn-b-E4_LIPOPROT	Disorders of lipoprotein metabolism and other lipidaemias || id:finn-b-E4_LIPOPROT	TRUE	reported	igd	1	TRUE
5	rs41279633	T	G	T	G	0.0959	-1.32694e-06	0.2101	0.154594	FALSE	FALSE	FALSE	ukb-b-3469	7	44580876	0.000203132	463010	0.99	Diagnoses - main ICD10: I21.9 Acute myocardial infarction, unspecified || id:ukb-b-3469	Diagnoses - main ICD10: I21.9 Acute myocardial infarction, unspecified	Diagnoses - main ICD10: I21.9 Acute myocardial infarction, unspecified || ||	TRUE	igd	NA	NA	NA	NA	NA	NA	NA	7	NA	0.0163	4.495e-09	44580876	finn-b-E4_LIPOPROT	Disorders of lipoprotein metabolism and other lipidaemias || id:finn-b-E4_LIPOPROT	TRUE	reported	igd	1	TRUE
6	rs499883	A	G	A	G	0.1107	-8.07967e-05	0.5291	0.614578	FALSE	FALSE	FALSE	ukb-b-3469	1	55519174	0.000153667	463010	0.6	Diagnoses - main ICD10: I21.9 Acute myocardial infarction, unspecified || id:ukb-b-3469	Diagnoses - main ICD10: I21.9 Acute myocardial infarction, unspecified	Diagnoses - main ICD10: I21.9 Acute myocardial infarction, unspecified || ||	TRUE	igd	NA	NA	NA	NA	NA	NA	NA	1	NA	0.0134	1.53815e-16	55519174	finn-b-E4_LIPOPROT	Disorders of lipoprotein metabolism and other lipidaemias || id:finn-b-E4_LIPOPROT	TRUE	reported	igd	1	TRUE
7	rs646356	A	T	A	T	0.0993	0.000185253	0.8319	0.84211	FALSE	TRUE	FALSE	ukb-b-3469	1	55167773	0.000208655	463010	0.37	Diagnoses - main ICD10: I21.9 Acute myocardial infarction, unspecified || id:ukb-b-3469	Diagnoses - main ICD10: I21.9 Acute myocardial infarction, unspecified	Diagnoses - main ICD10: I21.9 Acute myocardial infarction, unspecified || ||	TRUE	igd	NA	NA	NA	NA	NA	NA	NA	1	NA	0.018	3.16804e-08	55167773	finn-b-E4_LIPOPROT	Disorders of lipoprotein metabolism and other lipidaemias || id:finn-b-E4_LIPOPROT	TRUE	reported	igd	1	TRUE
8	rs646776	T	C	T	C	0.148	0.000805597	0.7856	0.777917	FALSE	FALSE	FALSE	ukb-b-3469	1	109818530	0.000176333	463010	4.90004e-06	Diagnoses - main ICD10: I21.9 Acute myocardial infarction, unspecified || id:ukb-b-3469	Diagnoses - main ICD10: I21.9 Acute myocardial infarction, unspecified	Diagnoses - main ICD10: I21.9 Acute myocardial infarction, unspecified || ||	TRUE	igd	NA	NA	NA	NA	NA	NA	NA	1	NA	0.0163	1.31492e-19	109818530	finn-b-E4_LIPOPROT	Disorders of lipoprotein metabolism and other lipidaemias || id:finn-b-E4_LIPOPROT	TRUE	reported	igd	1	TRUE
9	rs9644859	A	G	A	G	0.0935	0.000816591	0.4182	0.49005	FALSE	FALSE	FALSE	ukb-b-3469	9	22098574	0.00014655	463010	2.5e-08	Diagnoses - main ICD10: I21.9 Acute myocardial infarction, unspecified || id:ukb-b-3469	Diagnoses - main ICD10: I21.9 Acute myocardial infarction, unspecified	Diagnoses - main ICD10: I21.9 Acute myocardial infarction, unspecified || ||	TRUE	igd	TRUE	rs9644859	rs4977574	A	G	G	A	9	NA	0.0134	3.49382e-12	22090521	finn-b-E4_LIPOPROT	Disorders of lipoprotein metabolism and other lipidaemias || id:finn-b-E4_LIPOPROT	TRUE	reported	igd	1	TRUE

## Sheet: Stroke 
	SNP	effect_allele.exposure	other_allele.exposure	effect_allele.outcome	other_allele.outcome	beta.exposure	beta.outcome	eaf.exposure	eaf.outcome	remove	palindromic	ambiguous	id.outcome	chr	pos	se.outcome	samplesize.outcome	pval.outcome	outcome	originalname.outcome	outcome.deprecated	mr_keep.outcome	data_source.outcome	proxy.outcome	target_snp.outcome	proxy_snp.outcome	target_a1.outcome	target_a2.outcome	proxy_a1.outcome	proxy_a2.outcome	chr.exposure	samplesize.exposure	se.exposure	pval.exposure	pos.exposure	id.exposure	exposure	mr_keep.exposure	pval_origin.exposure	data_source.exposure	action	mr_keep
1	rs115478735	T	A	T	A	0.1251	0.00094463	0.1974	0.207051	FALSE	TRUE	FALSE	ukb-b-8714	9	136151806	0.000314734	461880	0.00269998	Vascular/heart problems diagnosed by doctor: Stroke || id:ukb-b-8714	Vascular/heart problems diagnosed by doctor: Stroke	Vascular/heart problems diagnosed by doctor: Stroke || ||	TRUE	igd	TRUE	rs115478735	rs600038	T	A	C	T	9	NA	0.0167	6.74062e-14	136149711	finn-b-E4_LIPOPROT	Disorders of lipoprotein metabolism and other lipidaemias || id:finn-b-E4_LIPOPROT	TRUE	reported	igd	1	TRUE
2	rs12131840	T	C	T	C	0.1005	0.00024282	0.1774	0.128901	FALSE	FALSE	FALSE	ukb-b-8714	1	66231771	0.000385215	461880	0.53	Vascular/heart problems diagnosed by doctor: Stroke || id:ukb-b-8714	Vascular/heart problems diagnosed by doctor: Stroke	Vascular/heart problems diagnosed by doctor: Stroke || ||	TRUE	igd	NA	NA	NA	NA	NA	NA	NA	1	NA	0.0175	8.49591e-09	66231771	finn-b-E4_LIPOPROT	Disorders of lipoprotein metabolism and other lipidaemias || id:finn-b-E4_LIPOPROT	TRUE	reported	igd	1	TRUE
3	rs12916	C	T	C	T	0.0802	-0.000402	0.4537	0.400527	FALSE	FALSE	FALSE	ukb-b-8714	5	74656539	0.000260363	461880	0.12	Vascular/heart problems diagnosed by doctor: Stroke || id:ukb-b-8714	Vascular/heart problems diagnosed by doctor: Stroke	Vascular/heart problems diagnosed by doctor: Stroke || ||	TRUE	igd	NA	NA	NA	NA	NA	NA	NA	5	NA	0.0133	1.892e-09	74656539	finn-b-E4_LIPOPROT	Disorders of lipoprotein metabolism and other lipidaemias || id:finn-b-E4_LIPOPROT	TRUE	reported	igd	1	TRUE
4	rs1367117	A	G	A	G	0.1196	0.000399078	0.2812	0.335113	FALSE	FALSE	FALSE	ukb-b-8714	2	21263900	0.000269967	461880	0.14	Vascular/heart problems diagnosed by doctor: Stroke || id:ukb-b-8714	Vascular/heart problems diagnosed by doctor: Stroke	Vascular/heart problems diagnosed by doctor: Stroke || ||	TRUE	igd	NA	NA	NA	NA	NA	NA	NA	2	NA	0.0148	5.25049e-16	21263900	finn-b-E4_LIPOPROT	Disorders of lipoprotein metabolism and other lipidaemias || id:finn-b-E4_LIPOPROT	TRUE	reported	igd	1	TRUE
5	rs2954021	G	A	G	A	-0.0984	-0.000165271	0.5364	0.504567	FALSE	FALSE	FALSE	ukb-b-8714	8	126482077	0.000255143	461880	0.52	Vascular/heart problems diagnosed by doctor: Stroke || id:ukb-b-8714	Vascular/heart problems diagnosed by doctor: Stroke	Vascular/heart problems diagnosed by doctor: Stroke || ||	TRUE	igd	NA	NA	NA	NA	NA	NA	NA	8	NA	0.0133	1.34803e-13	126482077	finn-b-E4_LIPOPROT	Disorders of lipoprotein metabolism and other lipidaemias || id:finn-b-E4_LIPOPROT	TRUE	reported	igd	1	TRUE
6	rs41279633	T	G	T	G	0.0959	0.000245747	0.2101	0.154567	FALSE	FALSE	FALSE	ukb-b-8714	7	44580876	0.00035335	461880	0.49	Vascular/heart problems diagnosed by doctor: Stroke || id:ukb-b-8714	Vascular/heart problems diagnosed by doctor: Stroke	Vascular/heart problems diagnosed by doctor: Stroke || ||	TRUE	igd	NA	NA	NA	NA	NA	NA	NA	7	NA	0.0163	4.495e-09	44580876	finn-b-E4_LIPOPROT	Disorders of lipoprotein metabolism and other lipidaemias || id:finn-b-E4_LIPOPROT	TRUE	reported	igd	1	TRUE
7	rs499883	A	G	A	G	0.1107	0.000395958	0.5291	0.614596	FALSE	FALSE	FALSE	ukb-b-8714	1	55519174	0.000267279	461880	0.14	Vascular/heart problems diagnosed by doctor: Stroke || id:ukb-b-8714	Vascular/heart problems diagnosed by doctor: Stroke	Vascular/heart problems diagnosed by doctor: Stroke || ||	TRUE	igd	NA	NA	NA	NA	NA	NA	NA	1	NA	0.0134	1.53815e-16	55519174	finn-b-E4_LIPOPROT	Disorders of lipoprotein metabolism and other lipidaemias || id:finn-b-E4_LIPOPROT	TRUE	reported	igd	1	TRUE
8	rs56132765	A	G	A	G	-0.1686	-0.000694321	0.08221	0.061221	FALSE	FALSE	FALSE	ukb-b-8714	2	44078853	0.000532647	461880	0.19	Vascular/heart problems diagnosed by doctor: Stroke || id:ukb-b-8714	Vascular/heart problems diagnosed by doctor: Stroke	Vascular/heart problems diagnosed by doctor: Stroke || ||	TRUE	igd	NA	NA	NA	NA	NA	NA	NA	2	NA	0.0243	4.40048e-12	44078853	finn-b-E4_LIPOPROT	Disorders of lipoprotein metabolism and other lipidaemias || id:finn-b-E4_LIPOPROT	TRUE	reported	igd	1	TRUE
9	rs646356	A	T	A	T	0.0993	-0.000174042	0.8319	0.842108	FALSE	TRUE	FALSE	ukb-b-8714	1	55167773	0.00036292	461880	0.630001	Vascular/heart problems diagnosed by doctor: Stroke || id:ukb-b-8714	Vascular/heart problems diagnosed by doctor: Stroke	Vascular/heart problems diagnosed by doctor: Stroke || ||	TRUE	igd	NA	NA	NA	NA	NA	NA	NA	1	NA	0.018	3.16804e-08	55167773	finn-b-E4_LIPOPROT	Disorders of lipoprotein metabolism and other lipidaemias || id:finn-b-E4_LIPOPROT	TRUE	reported	igd	1	TRUE
10	rs646776	T	C	T	C	0.148	0.000311668	0.7856	0.777899	FALSE	FALSE	FALSE	ukb-b-8714	1	109818530	0.000306671	461880	0.31	Vascular/heart problems diagnosed by doctor: Stroke || id:ukb-b-8714	Vascular/heart problems diagnosed by doctor: Stroke	Vascular/heart problems diagnosed by doctor: Stroke || ||	TRUE	igd	NA	NA	NA	NA	NA	NA	NA	1	NA	0.0163	1.31492e-19	109818530	finn-b-E4_LIPOPROT	Disorders of lipoprotein metabolism and other lipidaemias || id:finn-b-E4_LIPOPROT	TRUE	reported	igd	1	TRUE
11	rs7412	T	C	T	C	-0.4034	-0.00100297	0.05343	0.080163	FALSE	FALSE	FALSE	ukb-b-8714	19	45412079	0.000470128	461880	0.0329997	Vascular/heart problems diagnosed by doctor: Stroke || id:ukb-b-8714	Vascular/heart problems diagnosed by doctor: Stroke	Vascular/heart problems diagnosed by doctor: Stroke || ||	TRUE	igd	NA	NA	NA	NA	NA	NA	NA	19	NA	0.0307	1.91205e-39	45412079	finn-b-E4_LIPOPROT	Disorders of lipoprotein metabolism and other lipidaemias || id:finn-b-E4_LIPOPROT	TRUE	reported	igd	1	TRUE
12	rs74617384	T	A	T	A	0.2167	0.00119967	0.04583	0.078749	FALSE	TRUE	FALSE	ukb-b-8714	6	160997118	0.000473627	461880	0.0109999	Vascular/heart problems diagnosed by doctor: Stroke || id:ukb-b-8714	Vascular/heart problems diagnosed by doctor: Stroke	Vascular/heart problems diagnosed by doctor: Stroke || ||	TRUE	igd	NA	NA	NA	NA	NA	NA	NA	6	NA	0.0319	1.0311e-11	160997118	finn-b-E4_LIPOPROT	Disorders of lipoprotein metabolism and other lipidaemias || id:finn-b-E4_LIPOPROT	TRUE	reported	igd	1	TRUE
13	rs8106503	C	T	C	T	-0.2277	0.000301418	0.1021	0.117555	FALSE	FALSE	FALSE	ukb-b-8714	19	11196886	0.00039664	461880	0.450001	Vascular/heart problems diagnosed by doctor: Stroke || id:ukb-b-8714	Vascular/heart problems diagnosed by doctor: Stroke	Vascular/heart problems diagnosed by doctor: Stroke || ||	TRUE	igd	NA	NA	NA	NA	NA	NA	NA	19	NA	0.0224	2.99571e-24	11196886	finn-b-E4_LIPOPROT	Disorders of lipoprotein metabolism and other lipidaemias || id:finn-b-E4_LIPOPROT	TRUE	reported	igd	1	TRUE
14	rs964184	C	G	C	G	-0.185	8.02233e-06	0.8541	0.866406	FALSE	TRUE	FALSE	ukb-b-8714	11	116648917	0.000374857	461880	0.98	Vascular/heart problems diagnosed by doctor: Stroke || id:ukb-b-8714	Vascular/heart problems diagnosed by doctor: Stroke	Vascular/heart problems diagnosed by doctor: Stroke || ||	TRUE	igd	NA	NA	NA	NA	NA	NA	NA	11	NA	0.0189	1.61585e-22	116648917	finn-b-E4_LIPOPROT	Disorders of lipoprotein metabolism and other lipidaemias || id:finn-b-E4_LIPOPROT	TRUE	reported	igd	1	TRUE
15	rs9644859	A	G	A	G	0.0935	0.000183848	0.4182	0.490035	FALSE	FALSE	FALSE	ukb-b-8714	9	22098574	0.000254895	461880	0.47	Vascular/heart problems diagnosed by doctor: Stroke || id:ukb-b-8714	Vascular/heart problems diagnosed by doctor: Stroke	Vascular/heart problems diagnosed by doctor: Stroke || ||	TRUE	igd	TRUE	rs9644859	rs4977574	A	G	G	A	9	NA	0.0134	3.49382e-12	22090521	finn-b-E4_LIPOPROT	Disorders of lipoprotein metabolism and other lipidaemias || id:finn-b-E4_LIPOPROT	TRUE	reported	igd	1	TRUE

## Sheet: Peripheral vascular disease
	SNP	effect_allele.exposure	other_allele.exposure	effect_allele.outcome	other_allele.outcome	beta.exposure	beta.outcome	eaf.exposure	eaf.outcome	remove	palindromic	ambiguous	id.outcome	chr	pos	se.outcome	samplesize.outcome	pval.outcome	outcome	originalname.outcome	outcome.deprecated	mr_keep.outcome	data_source.outcome	proxy.outcome	target_snp.outcome	proxy_snp.outcome	target_a1.outcome	target_a2.outcome	proxy_a1.outcome	proxy_a2.outcome	chr.exposure	samplesize.exposure	se.exposure	pval.exposure	pos.exposure	id.exposure	exposure	mr_keep.exposure	pval_origin.exposure	data_source.exposure	action	mr_keep
1	rs12916	C	T	C	T	0.0802	-7.97365e-05	0.4537	0.400545	FALSE	FALSE	FALSE	ukb-b-4929	5	74656539	0.000118718	463010	0.5	Diagnoses - secondary ICD10: I73.9 Peripheral vascular disease, unspecified || id:ukb-b-4929	Diagnoses - secondary ICD10: I73.9 Peripheral vascular disease, unspecified	Diagnoses - secondary ICD10: I73.9 Peripheral vascular disease, unspecified || ||	TRUE	igd	NA	NA	NA	NA	NA	NA	NA	5	NA	0.0133	1.892e-09	74656539	finn-b-E4_LIPOPROT	Disorders of lipoprotein metabolism and other lipidaemias || id:finn-b-E4_LIPOPROT	TRUE	reported	igd	1	TRUE
2	rs1367117	A	G	A	G	0.1196	3.19442e-05	0.2812	0.335116	FALSE	FALSE	FALSE	ukb-b-4929	2	21263900	0.000123099	463010	0.8	Diagnoses - secondary ICD10: I73.9 Peripheral vascular disease, unspecified || id:ukb-b-4929	Diagnoses - secondary ICD10: I73.9 Peripheral vascular disease, unspecified	Diagnoses - secondary ICD10: I73.9 Peripheral vascular disease, unspecified || ||	TRUE	igd	NA	NA	NA	NA	NA	NA	NA	2	NA	0.0148	5.25049e-16	21263900	finn-b-E4_LIPOPROT	Disorders of lipoprotein metabolism and other lipidaemias || id:finn-b-E4_LIPOPROT	TRUE	reported	igd	1	TRUE
3	rs2954021	G	A	G	A	-0.0984	-0.000245792	0.5364	0.504574	FALSE	FALSE	FALSE	ukb-b-4929	8	126482077	0.000116337	463010	0.0350002	Diagnoses - secondary ICD10: I73.9 Peripheral vascular disease, unspecified || id:ukb-b-4929	Diagnoses - secondary ICD10: I73.9 Peripheral vascular disease, unspecified	Diagnoses - secondary ICD10: I73.9 Peripheral vascular disease, unspecified || ||	TRUE	igd	NA	NA	NA	NA	NA	NA	NA	8	NA	0.0133	1.34803e-13	126482077	finn-b-E4_LIPOPROT	Disorders of lipoprotein metabolism and other lipidaemias || id:finn-b-E4_LIPOPROT	TRUE	reported	igd	1	TRUE
4	rs499883	A	G	A	G	0.1107	-0.000197735	0.5291	0.614578	FALSE	FALSE	FALSE	ukb-b-4929	1	55519174	0.000121869	463010	0.1	Diagnoses - secondary ICD10: I73.9 Peripheral vascular disease, unspecified || id:ukb-b-4929	Diagnoses - secondary ICD10: I73.9 Peripheral vascular disease, unspecified	Diagnoses - secondary ICD10: I73.9 Peripheral vascular disease, unspecified || ||	TRUE	igd	NA	NA	NA	NA	NA	NA	NA	1	NA	0.0134	1.53815e-16	55519174	finn-b-E4_LIPOPROT	Disorders of lipoprotein metabolism and other lipidaemias || id:finn-b-E4_LIPOPROT	TRUE	reported	igd	1	TRUE
5	rs9644859	A	G	A	G	0.0935	0.000732116	0.4182	0.49005	FALSE	FALSE	FALSE	ukb-b-4929	9	22098574	0.000116225	463010	2.99999e-10	Diagnoses - secondary ICD10: I73.9 Peripheral vascular disease, unspecified || id:ukb-b-4929	Diagnoses - secondary ICD10: I73.9 Peripheral vascular disease, unspecified	Diagnoses - secondary ICD10: I73.9 Peripheral vascular disease, unspecified || ||	TRUE	igd	TRUE	rs9644859	rs4977574	A	G	G	A	9	NA	0.0134	3.49382e-12	22090521	finn-b-E4_LIPOPROT	Disorders of lipoprotein metabolism and other lipidaemias || id:finn-b-E4_LIPOPROT	TRUE	reported	igd	1	TRUE

## Sheet: Venous thromboembolism
	SNP	effect_allele.exposure	other_allele.exposure	effect_allele.outcome	other_allele.outcome	beta.exposure	beta.outcome	eaf.exposure	eaf.outcome	remove	palindromic	ambiguous	id.outcome	chr	pos	se.outcome	samplesize.outcome	pval.outcome	outcome	originalname.outcome	outcome.deprecated	mr_keep.outcome	data_source.outcome	chr.exposure	samplesize.exposure	se.exposure	pval.exposure	pos.exposure	id.exposure	exposure	mr_keep.exposure	pval_origin.exposure	data_source.exposure	action	mr_keep
1	rs1135498	C	T	C	T	0.094	0.000502327	0.2112	0.172833	FALSE	FALSE	FALSE	ukb-d-I9_VTE	13	115052938	0.000374705	361194	0.180054	Venous thromboembolism || id:ukb-d-I9_VTE	Venous thromboembolism	Venous thromboembolism || ||	TRUE	igd	13	NA	0.0165	1.32501e-08	115052938	finn-b-E4_LIPOPROT	Disorders of lipoprotein metabolism and other lipidaemias || id:finn-b-E4_LIPOPROT	TRUE	reported	igd	1	TRUE
2	rs114483871	T	C	T	C	0.2116	-0.0014498	0.03571	0.0237929	FALSE	FALSE	FALSE	ukb-d-I9_VTE	4	73990168	0.000892763	361194	0.104388	Venous thromboembolism || id:ukb-d-I9_VTE	Venous thromboembolism	Venous thromboembolism || ||	TRUE	igd	4	NA	0.0364	6.32295e-09	73990168	finn-b-E4_LIPOPROT	Disorders of lipoprotein metabolism and other lipidaemias || id:finn-b-E4_LIPOPROT	TRUE	reported	igd	1	TRUE
3	rs115478735	T	A	T	A	0.1251	0.00662021	0.1974	0.183962	FALSE	TRUE	FALSE	ukb-d-I9_VTE	9	136149711	0.000341684	361194	1.37753e-83	Venous thromboembolism || id:ukb-d-I9_VTE	Venous thromboembolism	Venous thromboembolism || ||	TRUE	igd	9	NA	0.0167	6.74062e-14	136149711	finn-b-E4_LIPOPROT	Disorders of lipoprotein metabolism and other lipidaemias || id:finn-b-E4_LIPOPROT	TRUE	reported	igd	1	TRUE
4	rs11591147	T	G	T	G	-0.4097	-0.000586087	0.03607	0.0176733	FALSE	FALSE	FALSE	ukb-d-I9_VTE	1	55505647	0.00100202	361194	0.558613	Venous thromboembolism || id:ukb-d-I9_VTE	Venous thromboembolism	Venous thromboembolism || ||	TRUE	igd	1	NA	0.0377	1.58891e-27	55505647	finn-b-E4_LIPOPROT	Disorders of lipoprotein metabolism and other lipidaemias || id:finn-b-E4_LIPOPROT	TRUE	reported	igd	1	TRUE
5	rs117113213	A	G	A	G	0.1487	-0.000956359	0.06541	0.032168	FALSE	FALSE	FALSE	ukb-d-I9_VTE	20	39165692	0.000757822	361194	0.206956	Venous thromboembolism || id:ukb-d-I9_VTE	Venous thromboembolism	Venous thromboembolism || ||	TRUE	igd	20	NA	0.0271	4.091e-08	39165692	finn-b-E4_LIPOPROT	Disorders of lipoprotein metabolism and other lipidaemias || id:finn-b-E4_LIPOPROT	TRUE	reported	igd	1	TRUE
6	rs117733303	G	A	G	A	0.4282	0.00111055	0.01135	0.0186119	FALSE	FALSE	FALSE	ukb-d-I9_VTE	6	160922870	0.000977631	361194	0.255975	Venous thromboembolism || id:ukb-d-I9_VTE	Venous thromboembolism	Venous thromboembolism || ||	TRUE	igd	6	NA	0.0644	2.86814e-11	160922870	finn-b-E4_LIPOPROT	Disorders of lipoprotein metabolism and other lipidaemias || id:finn-b-E4_LIPOPROT	TRUE	reported	igd	1	TRUE
7	rs12131840	T	C	T	C	0.1005	-7.2183e-05	0.1774	0.130787	FALSE	FALSE	FALSE	ukb-d-I9_VTE	1	66231771	0.000396805	361194	0.855653	Venous thromboembolism || id:ukb-d-I9_VTE	Venous thromboembolism	Venous thromboembolism || ||	TRUE	igd	1	NA	0.0175	8.49591e-09	66231771	finn-b-E4_LIPOPROT	Disorders of lipoprotein metabolism and other lipidaemias || id:finn-b-E4_LIPOPROT	TRUE	reported	igd	1	TRUE
8	rs12916	C	T	C	T	0.0802	0.000332986	0.4537	0.399752	FALSE	FALSE	FALSE	ukb-d-I9_VTE	5	74656539	0.00026984	361194	0.217199	Venous thromboembolism || id:ukb-d-I9_VTE	Venous thromboembolism	Venous thromboembolism || ||	TRUE	igd	5	NA	0.0133	1.892e-09	74656539	finn-b-E4_LIPOPROT	Disorders of lipoprotein metabolism and other lipidaemias || id:finn-b-E4_LIPOPROT	TRUE	reported	igd	1	TRUE
9	rs1367117	A	G	A	G	0.1196	-0.000725471	0.2812	0.338817	FALSE	FALSE	FALSE	ukb-d-I9_VTE	2	21263900	0.000279173	361194	0.00935987	Venous thromboembolism || id:ukb-d-I9_VTE	Venous thromboembolism	Venous thromboembolism || ||	TRUE	igd	2	NA	0.0148	5.25049e-16	21263900	finn-b-E4_LIPOPROT	Disorders of lipoprotein metabolism and other lipidaemias || id:finn-b-E4_LIPOPROT	TRUE	reported	igd	1	TRUE
10	rs182695896	C	A	C	A	0.2843	-0.00198494	0.02581	0.00982334	FALSE	FALSE	FALSE	ukb-d-I9_VTE	4	74813227	0.00136966	361194	0.147277	Venous thromboembolism || id:ukb-d-I9_VTE	Venous thromboembolism	Venous thromboembolism || ||	TRUE	igd	4	NA	0.0427	2.92415e-11	74813227	finn-b-E4_LIPOPROT	Disorders of lipoprotein metabolism and other lipidaemias || id:finn-b-E4_LIPOPROT	TRUE	reported	igd	1	TRUE
11	rs2954021	G	A	G	A	-0.0984	0.000233151	0.5364	0.505764	FALSE	FALSE	FALSE	ukb-d-I9_VTE	8	126482077	0.000264547	361194	0.378145	Venous thromboembolism || id:ukb-d-I9_VTE	Venous thromboembolism	Venous thromboembolism || ||	TRUE	igd	8	NA	0.0133	1.34803e-13	126482077	finn-b-E4_LIPOPROT	Disorders of lipoprotein metabolism and other lipidaemias || id:finn-b-E4_LIPOPROT	TRUE	reported	igd	1	TRUE
12	rs41279633	T	G	T	G	0.0959	-0.000203345	0.2101	0.154794	FALSE	FALSE	FALSE	ukb-d-I9_VTE	7	44580876	0.000365634	361194	0.578113	Venous thromboembolism || id:ukb-d-I9_VTE	Venous thromboembolism	Venous thromboembolism || ||	TRUE	igd	7	NA	0.0163	4.495e-09	44580876	finn-b-E4_LIPOPROT	Disorders of lipoprotein metabolism and other lipidaemias || id:finn-b-E4_LIPOPROT	TRUE	reported	igd	1	TRUE
13	rs499883	A	G	A	G	0.1107	-0.000127072	0.5291	0.614541	FALSE	FALSE	FALSE	ukb-d-I9_VTE	1	55519174	0.000276692	361194	0.646051	Venous thromboembolism || id:ukb-d-I9_VTE	Venous thromboembolism	Venous thromboembolism || ||	TRUE	igd	1	NA	0.0134	1.53815e-16	55519174	finn-b-E4_LIPOPROT	Disorders of lipoprotein metabolism and other lipidaemias || id:finn-b-E4_LIPOPROT	TRUE	reported	igd	1	TRUE
14	rs56132765	A	G	A	G	-0.1686	0.000616242	0.08221	0.0606791	FALSE	FALSE	FALSE	ukb-d-I9_VTE	2	44078853	0.000554204	361194	0.266165	Venous thromboembolism || id:ukb-d-I9_VTE	Venous thromboembolism	Venous thromboembolism || ||	TRUE	igd	2	NA	0.0243	4.40048e-12	44078853	finn-b-E4_LIPOPROT	Disorders of lipoprotein metabolism and other lipidaemias || id:finn-b-E4_LIPOPROT	TRUE	reported	igd	1	TRUE
15	rs646356	A	T	A	T	0.0993	-0.00048137	0.8319	0.842183	FALSE	TRUE	FALSE	ukb-d-I9_VTE	1	55167773	0.00037558	361194	0.199959	Venous thromboembolism || id:ukb-d-I9_VTE	Venous thromboembolism	Venous thromboembolism || ||	TRUE	igd	1	NA	0.018	3.16804e-08	55167773	finn-b-E4_LIPOPROT	Disorders of lipoprotein metabolism and other lipidaemias || id:finn-b-E4_LIPOPROT	TRUE	reported	igd	1	TRUE
16	rs646776	T	C	T	C	0.148	-0.00094436	0.7856	0.777398	FALSE	FALSE	FALSE	ukb-d-I9_VTE	1	109818530	0.000317477	361194	0.00293407	Venous thromboembolism || id:ukb-d-I9_VTE	Venous thromboembolism	Venous thromboembolism || ||	TRUE	igd	1	NA	0.0163	1.31492e-19	109818530	finn-b-E4_LIPOPROT	Disorders of lipoprotein metabolism and other lipidaemias || id:finn-b-E4_LIPOPROT	TRUE	reported	igd	1	TRUE
17	rs7412	T	C	T	C	-0.4034	0.0011301	0.05343	0.0804374	FALSE	FALSE	FALSE	ukb-d-I9_VTE	19	45412079	0.000486185	361194	0.0201034	Venous thromboembolism || id:ukb-d-I9_VTE	Venous thromboembolism	Venous thromboembolism || ||	TRUE	igd	19	NA	0.0307	1.91205e-39	45412079	finn-b-E4_LIPOPROT	Disorders of lipoprotein metabolism and other lipidaemias || id:finn-b-E4_LIPOPROT	TRUE	reported	igd	1	TRUE
18	rs74617384	T	A	T	A	0.2167	-0.000761531	0.04583	0.0806367	FALSE	TRUE	FALSE	ukb-d-I9_VTE	6	160997118	0.00048548	361194	0.116739	Venous thromboembolism || id:ukb-d-I9_VTE	Venous thromboembolism	Venous thromboembolism || ||	TRUE	igd	6	NA	0.0319	1.0311e-11	160997118	finn-b-E4_LIPOPROT	Disorders of lipoprotein metabolism and other lipidaemias || id:finn-b-E4_LIPOPROT	TRUE	reported	igd	1	TRUE
19	rs77645768	A	G	A	G	0.3141	0.000341731	0.02681	0.0249784	FALSE	FALSE	FALSE	ukb-d-I9_VTE	4	73668828	0.00088285	361194	0.698699	Venous thromboembolism || id:ukb-d-I9_VTE	Venous thromboembolism	Venous thromboembolism || ||	TRUE	igd	4	NA	0.0424	1.31704e-13	73668828	finn-b-E4_LIPOPROT	Disorders of lipoprotein metabolism and other lipidaemias || id:finn-b-E4_LIPOPROT	TRUE	reported	igd	1	TRUE
20	rs8106503	C	T	C	T	-0.2277	-0.000481171	0.1021	0.117281	FALSE	FALSE	FALSE	ukb-d-I9_VTE	19	11196886	0.000411215	361194	0.241952	Venous thromboembolism || id:ukb-d-I9_VTE	Venous thromboembolism	Venous thromboembolism || ||	TRUE	igd	19	NA	0.0224	2.99571e-24	11196886	finn-b-E4_LIPOPROT	Disorders of lipoprotein metabolism and other lipidaemias || id:finn-b-E4_LIPOPROT	TRUE	reported	igd	1	TRUE
21	rs964184	C	G	C	G	-0.185	0.000552685	0.8541	0.867818	FALSE	TRUE	FALSE	ukb-d-I9_VTE	11	116648917	0.000389933	361194	0.156372	Venous thromboembolism || id:ukb-d-I9_VTE	Venous thromboembolism	Venous thromboembolism || ||	TRUE	igd	11	NA	0.0189	1.61585e-22	116648917	finn-b-E4_LIPOPROT	Disorders of lipoprotein metabolism and other lipidaemias || id:finn-b-E4_LIPOPROT	TRUE	reported	igd	1	TRUE
22	rs9644859	A	G	A	G	0.0935	-0.000418359	0.4182	0.495806	FALSE	FALSE	FALSE	ukb-d-I9_VTE	9	22090521	0.000264506	361194	0.113727	Venous thromboembolism || id:ukb-d-I9_VTE	Venous thromboembolism	Venous thromboembolism || ||	TRUE	igd	9	NA	0.0134	3.49382e-12	22090521	finn-b-E4_LIPOPROT	Disorders of lipoprotein metabolism and other lipidaemias || id:finn-b-E4_LIPOPROT	TRUE	reported	igd	1	TRUE
